1 **MiR-339-3p aggravates rat vascular inflammation induced by AT1R autoantibodies by**  
2 **down-regulating BK $\alpha$  protein expression**

3 Yang Li<sup>1#</sup>, Yan Sun<sup>1,2#</sup>, Mingming Yue<sup>1</sup>, Ming Gao<sup>1</sup>, Li Wang<sup>3</sup>, Ye Wu<sup>1</sup>, Xiaochen Yin<sup>1</sup>, Suli  
4 Zhang<sup>1\*</sup>, Huirong Liu<sup>1,4\*</sup>

5 <sup>1</sup>Department of Physiology & Pathophysiology, School of Basic Medical Sciences, Capital  
6 Medical University, 100069 Beijing, China.

7 <sup>2</sup>State Key Laboratory of Medical Molecular Biology, Institute of Basic Medical Sciences,  
8 Chinese Academy of Medical Sciences, School of Basic Medicine Peking Union Medical  
9 College, 100730 Beijing, China.

10 <sup>3</sup>Department of Pathology, Shanxi Medical University, 030001 Taiyuan, China.

11 <sup>4</sup>Beijing Key Laboratory of Metabolic Disorder Related Cardiovascular Disease, Capital  
12 Medical University, 100069 Beijing, China.

13 # **Equal Contribution**

14 \* **Corresponding Author**

15 **Running Title:** miR-339-3p aggravates vascular inflammation

16 **Address correspondence to:**

17 Huirong Liu, MD, PhD

18 Department of Physiology & Pathophysiology, School of Basic Medical Sciences, Capital  
19 Medical University

20 Capital Medical University, Beijing City, 100069, China

21 Tel: +86-010-83911830

22 E-mail: liuhr2000@ccmu.edu.cn

23 Suli Zhang, PhD

24 Department of Physiology & Pathophysiology, School of Basic Medical Sciences, Capital  
25 Medical University

26 10 Xitoutiao, You An Men Street, Beijing City, 100069, China

27 Tel: +86-010-83911831

28 E-mail: sueney716@126.com

29

30

## 31 **Abstract**

32 The abnormality of large-conductance calcium-activated potassium channels (BK channels) is an  
33 important factor in inducing vascular inflammation. BK channel agonists can readily recover BK  
34 channel function and improve vascular inflammation. However, it is not clear how to improve BK  
35 dysfunction caused by downregulation of BK channel protein expression. This study found that  
36 angiotensin II-1 receptor autoantibodies (AT1-AA), which are widely present in the body of various  
37 types of cardiovascular diseases, can down-regulate the expression of BK channel protein and induce  
38 vascular inflammation. Further research found that the elevated neural precursor cells expressed  
39 developmentally downregulated 4-like (NEDD4L) protein level is involved in the down-regulation of  
40 BK channel  $\alpha$  subunit (BK $\alpha$ ) protein level by AT1-AA. Bioinformatics analysis and experiments have  
41 confirmed that miR-339-3p plays an irreplaceable role in the high expression of NEDD4L and the low  
42 expression of BK $\alpha$ , and aggravates the vascular inflammation induced by AT1-AA. Overall, AT1-AA  
43 increased miR-339-3p expression (targeting BK $\alpha$  via the miR-339-3p/NEDD4L axis or miR-339-3p  
44 alone), reduced BK $\alpha$  protein expression in VSMCs, and induced vascular inflammation. The results of  
45 the study indicate that miR-339-3p may become a new target for reversing vascular inflammation in  
46 AT1-AA-positive patients.

## 47 **Key words**

48 Angiotensin II-1 receptor autoantibody, vascular inflammation, BK channel, NEDD4L, miR-339-  
49 3p

## 50 **Introduction**

51 Vascular inflammation is the pathological basis of various cardiovascular diseases [1].

52 Inflammatory diseases such as hypertension, atherosclerosis and diabetes are closely related to  
53 changes in the expression and function of large-conductance calcium-activated potassium channel  
54 (BK channel) [2]. BK channel is the kind of  $K^+$  channel with the highest expression, the widest  
55 distribution, and the largest conductance in vascular smooth muscle cells (VSMCs) [3, [4]. Studies  
56 have shown that abnormal BK channel function is involved in the occurrence and development of  
57 various inflammations [5, [6]. BK channel agonists can easily restore the function of BK channel and  
58 improve vascular inflammation [5, [7]. However, how to improve BK dysfunction caused by the  
59 down-regulation of BK channel protein expression has not been understood. Therefore, the factors  
60 that reduce the expression of BK channels in VSMCs need to be further explored.

61 The BK channel is known to be closely related to the renin angiotensin aldosterone system (RAAS)  
62 [8, [9]. Overactivation of angiotensin II-1 receptor (AT1R) has proven to be an important reason for  
63 the downregulation of BK channel expression in VSMCs [10, [11]. Angiotensin II-1 receptor  
64 autoantibody (AT1-AA) is an agonist-like autoantibody that continuously activates AT1R and exerts a  
65 vasoconstrictive effect [12]. Studies have shown that AT1-AA is prevalent in vascular inflammation-  
66 related diseases, e.g., hypertension [13] and coronary heart disease [14]. However, whether AT1-AA  
67 can induce vascular inflammation by decreasing BK channel expression in VSMCs and the  
68 underlying molecular mechanisms remains unknown.

69 Increased protein degradation is an important reason for the decrease in protein expression. Among  
70 many pathways of protein degradation, the ubiquitin-proteasome pathway is responsible for 80%-90%  
71 of the turnover of intracellular proteins and plays a more important role [15, [16]. Besides, cellular  
72 autophagy and apoptosis are also common forms of protein degradation. However, the pathway by  
73 which AT1-AA down-regulates the expression of BK channel protein in VSMCs is not clear. This

74 study screened the pathways involved in AT1-AA down-regulating BK channel protein expression in  
75 VSMCs and further explored the possible molecular mechanism in the process of AT1-AA down-  
76 regulating the expression of BK channel protein.

## 77 **Results**

### 78 **1. AT1-AA reduced the expression of BK $\alpha$ protein in rat thoracic aortic VSMCs through AT1R**

79 Rats were actively immunized with AT1R-ECII for 12 weeks. The results showed that the OD value  
80 of AT1-AA in the serum of AT1R-ECII group rats was significantly higher than the OD value of AT1-  
81 AA in the serum of saline group rats (Suppl. Figure 1A), suggesting that the AT1-AA active  
82 immunization rat model was successfully established. Further, the systolic and diastolic arterial blood  
83 pressures of AT1-AA-positive rats were found to be significantly increased (Suppl. Figure 1B), and  
84 ultrasound results showed a significant increase in the thickness of the thoracic aortic vessel wall  
85 (Suppl. Figure 1C), indicating that the blood vessels have a damaged phenotype. To verify the effect  
86 of AT1-AA on the expression of BK channel proteins in VSMCs, we detected the expression of BK  
87 protein by Western blot and immunofluorescence. The results showed that compared with the saline  
88 group, the BK $\alpha$  protein level in the thoracic aorta of AT1-AA-positive rats was significantly reduced  
89 (Figure. 1A-B), but there was no significant difference in the BK $\beta$ 1 protein level compared with the  
90 saline group (Suppl. Figure 1G-H). VSMCs treated with AT1-AA also showed similar results (Figure.  
91 1C and Suppl. Figure 1I).

92 To further verify whether the decreased BK $\alpha$  protein expression in VSMCs induced by AT1-AA  
93 was dependent on the AT1R pathway, we found that AT1-AA did not affect the protein level of BK $\alpha$  in  
94 the thoracic aorta of AT1R-knockout rats following active immunization (Figure. 1D-E). In addition,

95 there was no significant change in BK $\alpha$  protein expression when VSMCs were pretreated with the  
 96 AT1R blocker telmisartan (TST) or antigen peptide AT1R-ECII (Figure. 1F-G). The above results  
 97 indicated that AT1-AA downregulated the protein expression of BK $\alpha$  in VSMCs via an AT1R-  
 98 dependent pathway.

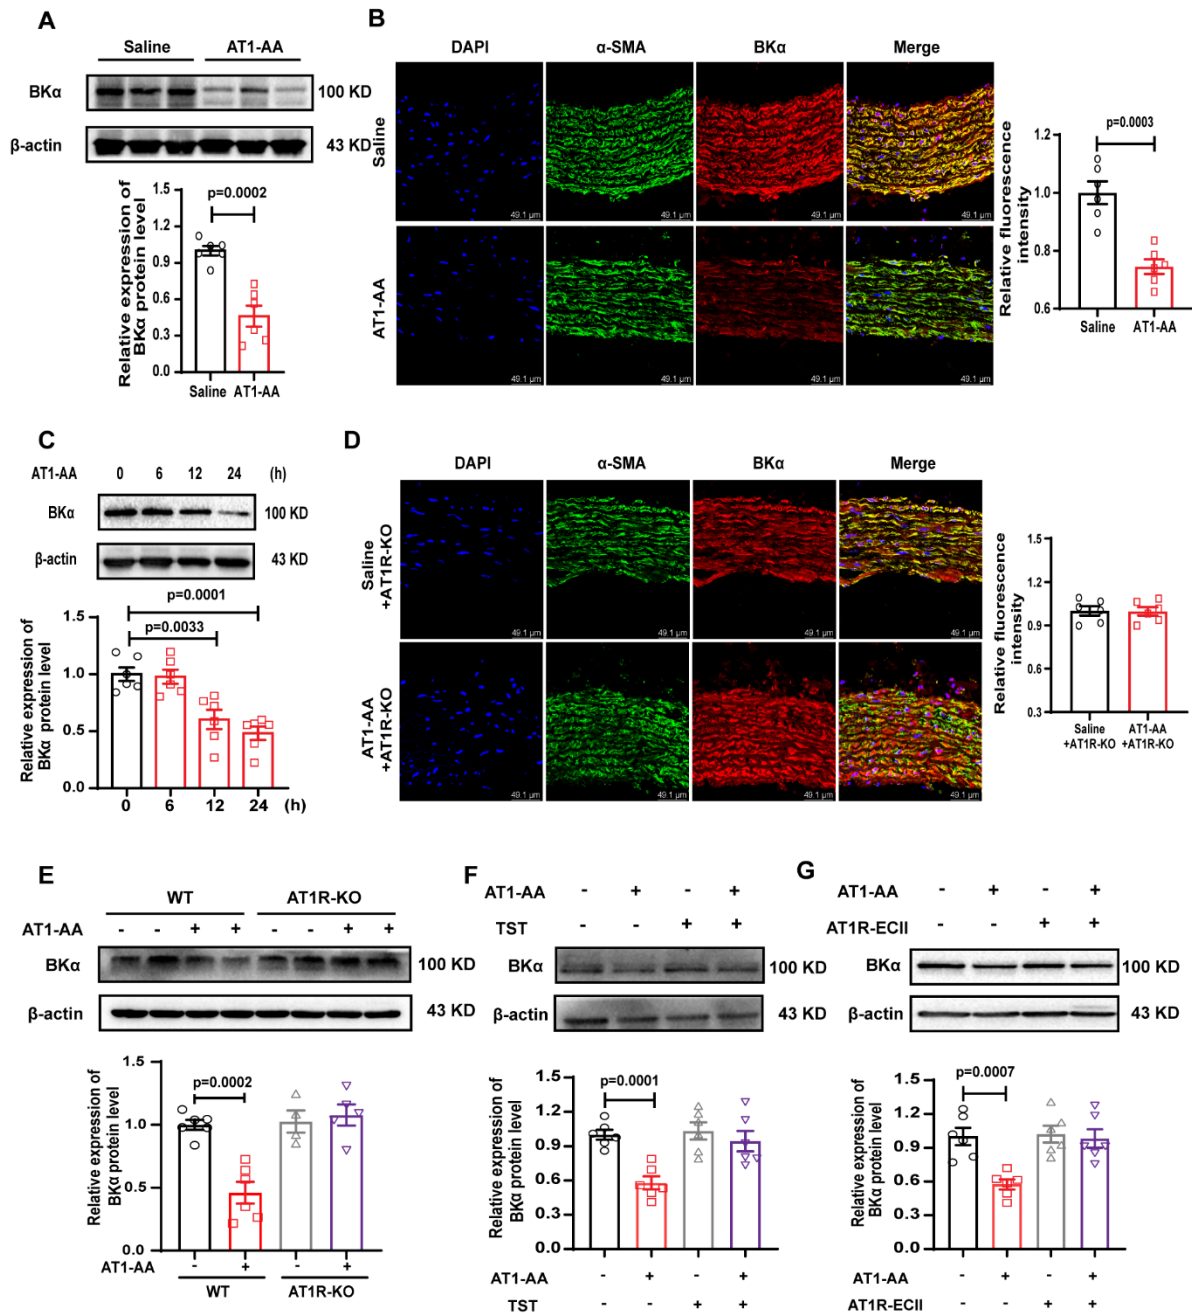

99

100 **Figure 1. AT1-AA affected the expression of BK $\alpha$  protein in rat thoracic aortae and VSMCs.**

101 Western blot (A) and immunofluorescence (B) were used to detect the BK $\alpha$  protein level in the  
102 thoracic aorta of AT1-AA-positive rats, bar=49.1  $\mu$ m, n=6. (C) Changes in BK $\alpha$  protein levels in  
103 VSMCs caused by AT1-AA at different times were detected, n=6. Immunofluorescence (D) and  
104 Western blotting (E) were used to detect the changes in BK $\alpha$  protein levels in the thoracic aorta of  
105 AT1-AA-positive AT1R knockout rats, bar=49.1  $\mu$ m, n=4, 6. (F) After pretreating VSMCs with  
106 telmisartan to block AT1R, the changes in BK $\alpha$  protein levels caused by AT1-AA were detected (n=6).  
107 (G) Western blotting was used to detect the BK $\alpha$  protein level after treating the VSMCs with the  
108 mixture for 24 h, in which AT1R-ECII was premixed with AT1-AA, n=6. The results of each sample  
109 were tested three times.

## 110 **2. Downregulation of BK $\alpha$ protein in VSMCs promoted the vascular inflammatory response**

### 111 **induced by AT1-AA**

112 CD3, CD19 and CD68 were used to label T and B lymphocytes and macrophages, respectively.  
113 Immunofluorescence staining revealed that inflammatory cells evidently increased in the middle layer  
114 of the thoracic aorta of AT1-AA-positive rats (Figure. 2A and Suppl. Figure 2A). Meanwhile, the  
115 protein expression of inflammatory cytokines (including IL-6, IL-1 $\beta$  and TNF- $\alpha$ ) in the thoracic aortas  
116 of AT1-AA-positive rats also increased significantly (Figure. 2B). After treatment of primary cultured  
117 rat thoracic aortic VSMCs with AT1-AA, the protein expression of inflammatory cytokines in cells  
118 (Figure. 2C) and cell supernatant (Figure. 2D) apparently increased. Correlation analysis found that  
119 the decreased BK $\alpha$  protein level induced by AT1-AA was significantly related to the high expression  
120 of inflammatory cytokines in VSMCs (Figure. 2E).

121 To prove that low expression of BK $\alpha$  protein in VSMCs was involved in AT1-AA-induced vascular  
122 inflammation, immunofluorescence results were obtained for the thoracic aorta of BK $\alpha$ -knockout rats,  
123 and the results indicated that compared with wild-type rats, the infiltration of inflammatory cells  
124 increased significantly in the vascular wall of the thoracic aortas of BK $\alpha$ -knockout rats (Figure. 3A

125 and Suppl. Figure 2F). Moreover, compared with the vehicle group, the IL-6, IL-1 $\beta$  and TNF- $\alpha$   
126 protein levels increased significantly after BK $\alpha$  knockdown in primary VSMCs (Figure. 3B) and cell  
127 supernatant (Figure. 3C). The BK $\alpha$  overexpression adenovirus was used to upregulate the BK $\alpha$   
128 protein level in the blood vessels of AT1-AA-positive rats, and the results showed that BK $\alpha$   
129 overexpression was able to reverse the AT1-AA-induced inflammatory cell infiltration in the middle  
130 layer of thoracic aorta blood vessels (Figure. 3D and Suppl. Figure 2K) and the expression of  
131 inflammatory cytokines in blood vessels (Figure. 3E).

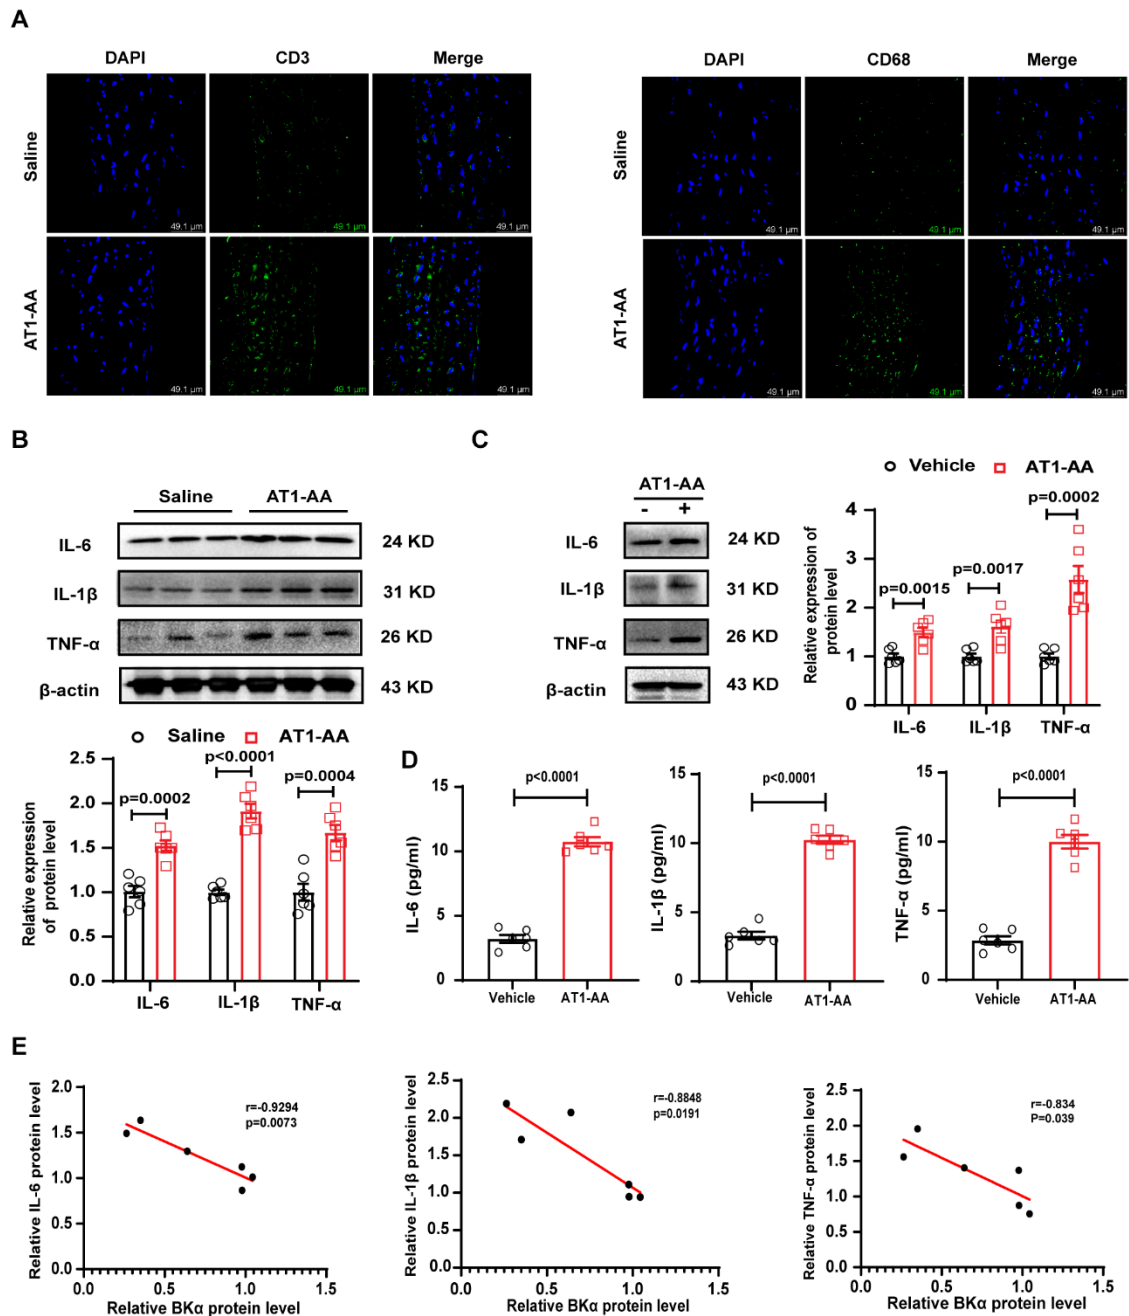

132

133 **Figure 2. The high expression of inflammatory cytokines induced by AT1-AA is negatively**

134 **correlated with the level of BK $\alpha$  protein.** (A) Immunofluorescence was used to detect the  
135 expression of CD3 and CD68 in the thoracic aortic vessel wall of AT1-AA-positive rats, bar=49.1  $\mu$ m.

136 The protein expression of inflammatory cytokines (including IL-6, IL-1 $\beta$  and TNF- $\alpha$ ) in (B) the  
137 thoracic aorta of AT1-AA-positive rats, and (C) VSMCs treated with AT1-AA were detected, n=6. (D)

138 To detect the protein expression of inflammatory cytokines (including IL-6, IL-1 $\beta$  and TNF- $\alpha$ ) in the



139 culture supernatant of VSMC after AT1-AA treatment though ELISA, n= 6. (E) The relationship  
 140 between the downregulation of BK $\alpha$  protein levels and the high expression of inflammatory cytokines  
 141 induced by AT1-AA in vitro was analysed. The results of each sample were tested three times.

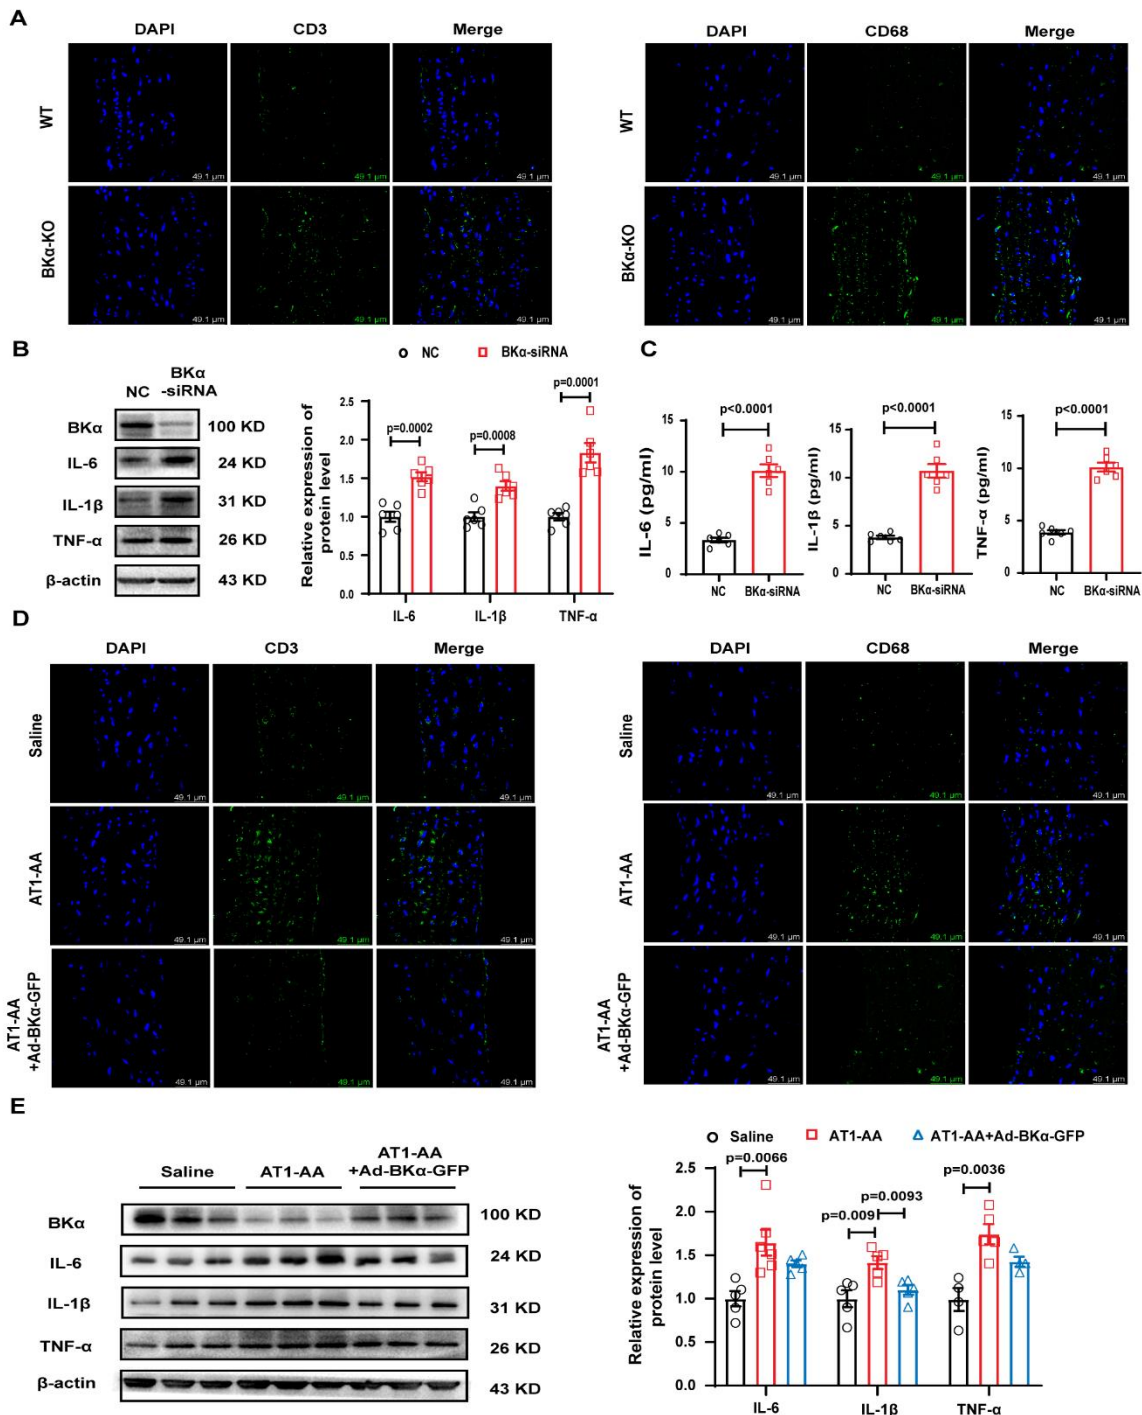

142  
 143 **Figure 3. The downregulation of BK $\alpha$  protein levels in VSMCs participated in AT1-AA-induced**  
 144 **vascular inflammation.** (A) Immunofluorescence was used to observe the expression changes of

145 CD3 and CD68 in the thoracic aortic wall of BK $\alpha$  knockout rats, bar=49.1  $\mu$ m. Western blot and  
146 ELISA were used to detect the protein expression of IL-6, IL-1 $\beta$  and TNF- $\alpha$  in (B) primary VSMCs,  
147 and (C) cell supernatant after knocking down BK $\alpha$ , n=6. (D) After overexpression of BK $\alpha$ ,  
148 immunofluorescence was used to observe the changes in inflammatory cell marker molecules  
149 (bar=49.1  $\mu$ m). (E) Western blot was used to detect the reverse effect of BK $\alpha$  overexpression on the  
150 increased expression of inflammatory cytokines induced by AT1-AA in vivo, n=4, 5. The results of  
151 each sample were tested three times.

### 152 **3. AT1-AA could reduce the expression of BK $\alpha$ by increasing the ubiquitin-related protein** 153 **NEDD4L in VSMCs**

154 Using RT-PCR to detect the effect of AT1-AA on the BK $\alpha$  mRNA level of AT1-AA-positive rat  
155 aortas and VSMCs treated with AT1-AA, we found that AT1-AA did not change the BK $\alpha$  mRNA level  
156 (Suppl. Figure 3A and Figure. 4A), suggesting that AT1-AA cannot affect the BK $\alpha$  transcription of  
157 VSMCs. The posttranslational modification of proteins is an important regulatory mechanism that  
158 affects the protein level [17]. Therefore, the ubiquitin proteasome pathway inhibitor MG-132,  
159 autophagy inhibitor 3-MA, and apoptosis inhibitor Z-VAD-FMK were used to verify which pathway  
160 was involved in the reduction in BK $\alpha$  protein expression, and MG-132 obviously reversed the  
161 downregulation of BK $\alpha$  protein expression in VSMCs induced by AT1-AA (Figure. 4B and Suppl.  
162 Figure 3B), demonstrating that the ubiquitin pathway was largely involved in the decrease in BK $\alpha$   
163 protein levels induced by AT1-AA. Subsequently, the CoIP method was used to confirm that AT1-AA  
164 can directly induce a significant increase in the ubiquitination level of BK $\alpha$  in VSMCs (Figure. 4C).  
165 Next, the E3 ligase NEDD4L was found to possibly be the ubiquitin-related protease involved in the  
166 decrease in BK $\alpha$  protein levels by AT1-AA through protein profile analysis (Suppl. Figure 3C-D).  
167 AT1-AA markedly increased the NEDD4L protein level in VSMCs, as shown by Western blot

168 analysis (Figure. 4D). The immunofluorescence results were consistent with the Western blot results;  
169 compared with the vehicle group, and the red fluorescence-labelled NEDD4L was significantly  
170 increased in the VSMCs treated with AT1-AA (Figure. 4E). We identified that AT1-AA can  
171 significantly increase the protein level of NEDD4L bound to BK $\alpha$  in VSMCs using the CoIP method,  
172 and it was further confirmed that under AT1-AA treatment, the interaction between NEDD4L and  
173 BK $\alpha$  evidently increased (Figure. 4F). After knocking down NEDD4L in VSMCs and then giving  
174 AT1-AA treatment, the phenomenon of AT1-AA decreasing the expression of BK $\alpha$  was found to  
175 disappear (Figure. 4G). The above results suggested that AT1-AA promoted the interaction between  
176 NEDD4L and BK $\alpha$  protein by increasing the protein level of NEDD4L, thereby downregulating the  
177 expression of BK $\alpha$  protein in VSMCs.



184 Western blot and (E) immunofluorescence, bar=75  $\mu$ m, n=6. (F) The protein level of NEDD4L  
185 connected with BK $\alpha$  after AT1-AA treatment to VSMCs was detected by the CoIP. (G) Western blot  
186 was used to observe the effect of AT1-AA on BK $\alpha$  protein level after knocking down NEDD4L, n=6.  
187 The results of each sample were tested three times.

#### 188 **4. MiR-339-3p inhibited the expression of BK $\alpha$ in VSMCs by upregulating NEDD4L**

189 Numerous studies have shown that if the microRNA combines with the 5'UTR of the target gene  
190 mRNA, the expression of the target gene can be promoted [18], and if the microRNA combines with  
191 the 3'UTR of the target gene mRNA, it will cause the degradation of the mRNA or inhibit the  
192 translation of the target mRNA. To explore the mechanism by which AT1-AA increased NEDD4L  
193 protein expression and downregulated BK $\alpha$  protein expression in VSMCs, three miRNAs were  
194 screened out that simultaneously target the 5'UTR of NEDD4L and the 3'UTR of BK $\alpha$  through  
195 bioinformatics analysis (<http://mirwalk.umm.uni-heidelberg.de/>), including miR-145-5p, miR-149-5p  
196 and miR-339-3p (Figure. 5A). The expression of miR-339-3p was also found to increase most  
197 significantly after AT1-AA treatment of VSMCs (Figure. 5B). The expression of miR-339-3p in the  
198 thoracic aortas of AT1-AA-positive rats also increased significantly (Figure. 5C). Meanwhile,  
199 fluorescence in situ hybridization also showed that the expression of miR-339-3p in the cytoplasm of  
200 VSMCs treated with AT1-AA was significantly higher than the expression of miR-339-3p in the  
201 cytoplasm of the vehicle group (Figure. 5D). The above results indicated that AT1-AA can increase  
202 the expression of miR-339-3p in VSMCs. To further prove that miR-339-3p can affect the protein  
203 expression of NEDD4L and BK $\alpha$  in VSMCs, we used bioinformatics analysis to identify potential  
204 matching sites between miR-339-3p and the two proteins and found that there were binding sites for  
205 rat miR-339-3p in the 5'UTR of NEDD4L (Figure. 5E) and the 3'UTR of BK $\alpha$  (Figure. 5I).

206 To verify the effective combination of miR-339-3p and the NEDD4L 5'UTR and evaluate the effect

207 of miR-339-3p on NEDD4L expression, we constructed a psi-check 2-NEDD4L-5'UTR plasmid  
208 (Suppl. Figure 4B), and it was cotransfected with miR-339-3p mimic into HEK293A cells. The results  
209 of the dual luciferase reporter assay showed that compared with psi-check 2, miR-339-3p mimics and  
210 psi-check 2-NEDD4L-5'UTR cotransfection significantly increased the luciferase activity (Figure.  
211 5F). Then, we overexpressed or knocked down miR-339-3p in VSMCs and observed the protein  
212 expression of NEDD4L. The results showed that overexpression of miR-339-3p significantly  
213 increased the expression of NEDD4L protein, while knockdown of miR-339-3p significantly  
214 decreased the expression of NEDD4L protein (Figure. 5G). When VSMCs were treated with AT1-AA  
215 after knockdown of miR-339-3p, the protein level of NEDD4L evidently did not change (Figure. 5H),  
216 suggesting that miR-339-3p was an important mechanism of AT1-AA-induced changes in NEDD4L  
217 protein levels.

218 To verify the effective binding of miR-339-3p to the BK $\alpha$  3'UTR and evaluate whether miR-339-  
219 3p has a direct effect on the expression of BK $\alpha$ , we also constructed a psi-check 2-BK $\alpha$ -3'UTR  
220 plasmid (Suppl. Figure 4C) and cotransfected the plasmid with miR-339-3p mimic into HEK293A  
221 cells. The results showed that miR-339-3p mimic and psi-check 2-BK $\alpha$ -3'UTR cotransfection  
222 significantly decreased luciferase activity (Figure. 5J). Overexpression of miR-339-3p was also found  
223 to decrease the level of BK $\alpha$  protein, while inhibiting miR-339-3p induced an increase in BK $\alpha$  protein  
224 levels (Figure. 5K). After miR-339-3p was inhibited and then treated with AT1-AA, the decrease of  
225 BK $\alpha$  protein levels in VSMCs induced by AT1-AA disappeared (Figure. 5L), suggesting that miR-  
226 339-3p was also one of the reasons for the downregulation of BK $\alpha$  protein expression in VSMCs  
227 induced by AT1-AA.

228 The above results suggested that the increase in miR-339-3p expression in VSMCs induced by



229 AT1-AA not only promoted the decrease in BK $\alpha$  expression by upregulating the NEDD4L protein  
 230 level but also directly decreased the protein expression of BK $\alpha$  in VSMCs.

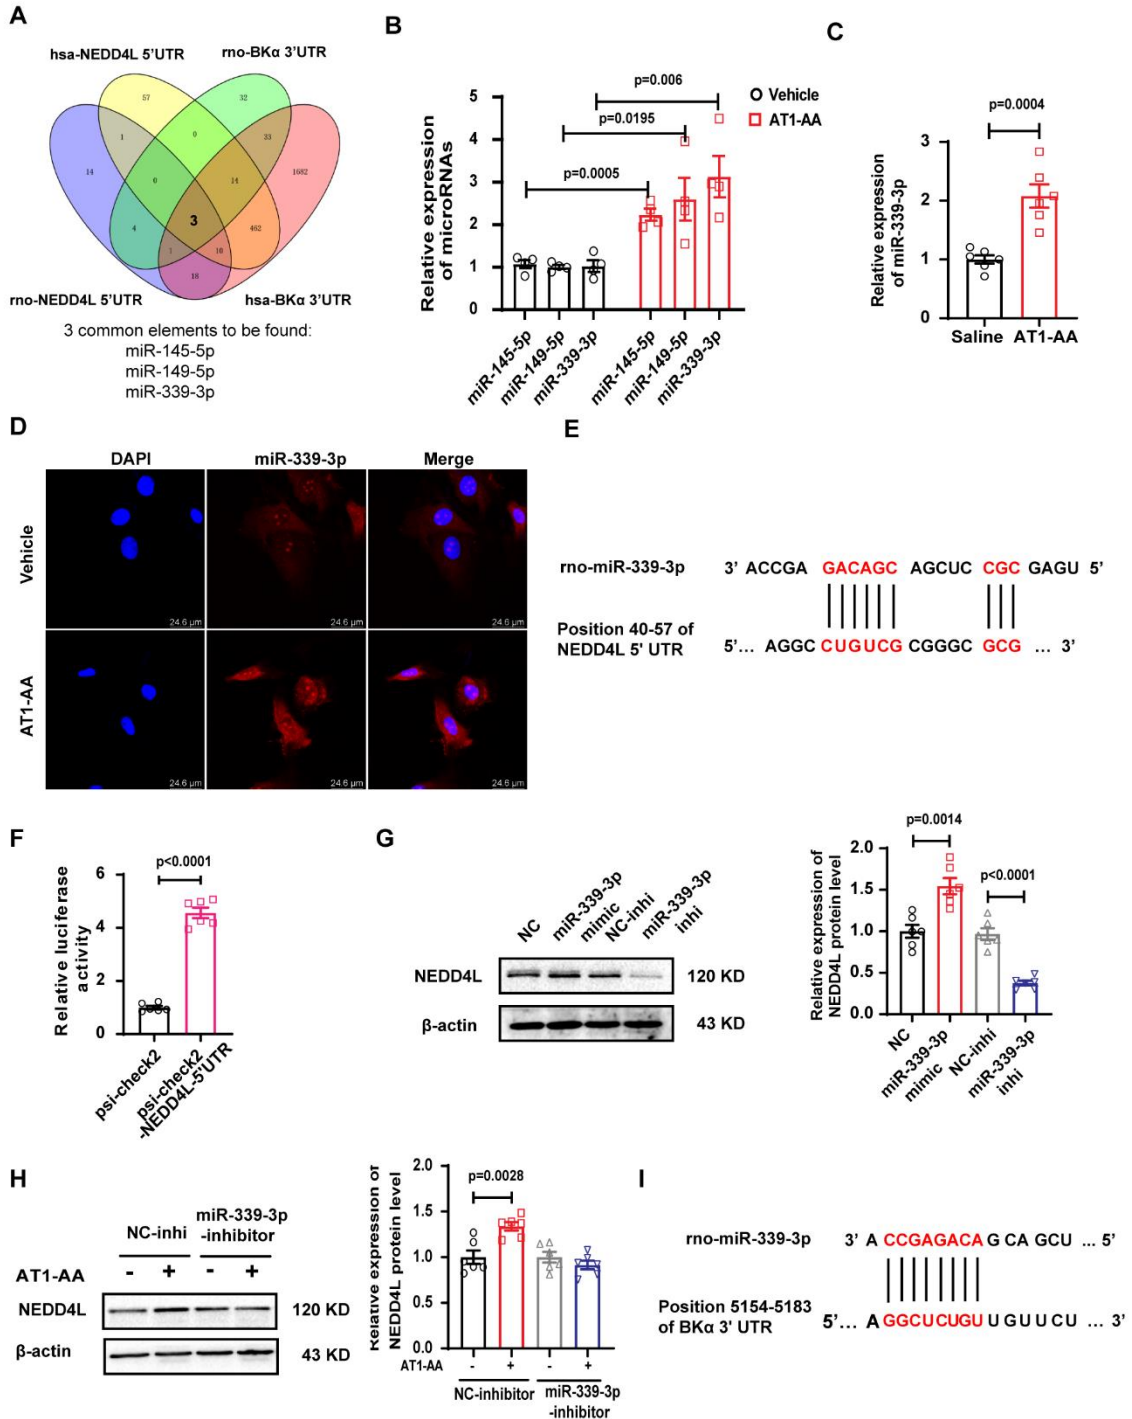

231

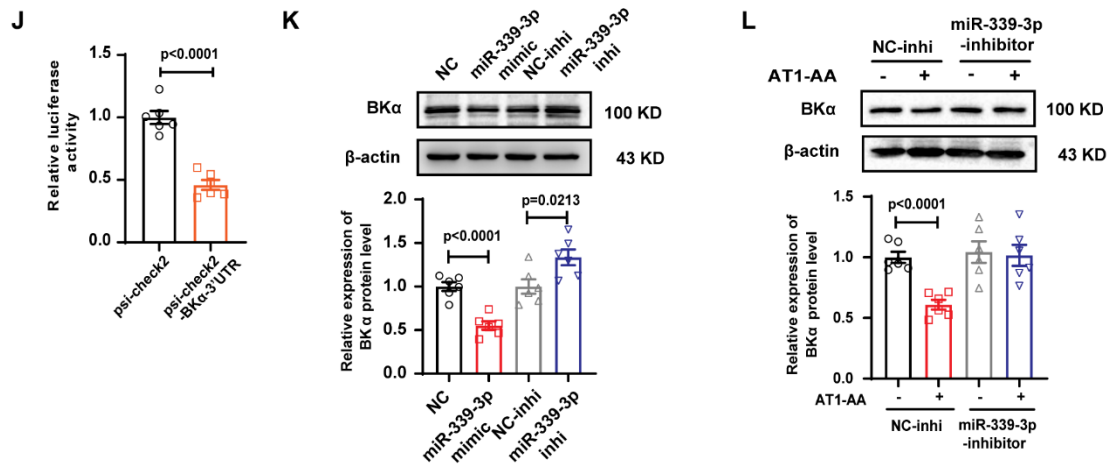

232

233 **Figure 5. miR-339-3p reduced the expression of BKα in VSMCs by upregulating NEDD4L.** (A)

234 miRNAs targeting the NEDD4L 5'UTR and BKα 3'UTR were analysed by bioinformatics

235 (<http://mirwalk.umm.uni-heidelberg.de/>). (B) The expression of different miRNAs in AT1-AA-treated

236 VSMCs and (C) the expression of miR-339-3p in the thoracic aorta of AT1-AA-positive rats were

237 detected by RT-PCR, n=4. 6. (D) FISH was used to observe the level of miR-339-3p in VSMCs

238 treated with AT1-AA; bar=24.6 μm. (E) The binding sites of miR-339-3p and the NEDD4L 5'UTR

239 were analysed by bioinformatics. (F) The effective binding of miR-339-3p and the NEDD4L 5'UTR

240 was proven by the luciferase reporter gene method, n=6. Western blot was used to detect (G) the

241 changes in NEDD4L protein levels after overexpression/inhibition of miR-339-3p, and (H) after

242 inhibiting miR-339-3p, the NEDD4L protein level was detected in VSMCs treated with AT1-AA

243 (n=6). The binding sites of miR-339-3p and the BKα 3'UTR were analysed by bioinformatics (I). (J)

244 The effective binding of miR-339-3p and the BKα 3'UTR was proven by the luciferase reporter gene

245 method, n=6. (K) Western blot was used to detect the changes in BKα protein levels after

246 overexpression/inhibition of miR-339-3p, and (L) the inhibition of miR-339-3p before treatment with

247 AT1-AA was used to detect BKα protein levels, n=6. The results of each sample were tested three

248 times.

## 249 **5. Inhibition of miR-339-3p can reverse vascular inflammation induced by AT1-AA in vivo**

250 We tried to use antagomir-339-3p to reverse the decrease in BKα protein levels and vascular



251 inflammation in AT1-AA-positive rats. First, to prove the effectiveness of antagomir-339-3p, VSMCs  
252 were transfected with antagomir-339-3p, and miR-339-3p expression in VSMCs was significantly  
253 reduced (Suppl. Figure 5A). Similarly, antagomir-339-3p successfully inhibited the expression of  
254 miR-339-3p in SD rats through tail vein injection (Figure. 6B). Then, the BK $\alpha$  protein level and the  
255 protein expression of inflammatory cytokines in rat thoracic aortas were detected. Compared with the  
256 AT1-AA group, treatment with antagomir-339-3p reversed the decreased BK $\alpha$  protein level (Figure.  
257 6C-D) and lessened the infiltration of inflammatory cells in the rat thoracic aortas induced by AT1-AA  
258 via immunofluorescence (Figure. 6E). Finally, we found that compared with the AT1-AA group,  
259 antagomir-339-3p injection reversed the increased expression of the inflammatory cytokines IL-6, IL-  
260 1 $\beta$  and TNF- $\alpha$  in the rat thoracic aortas (Figure. 6F). The results of small animal ultrasound showed  
261 that after the AT1-AA-positive rats were injected with antagomir-339-3p, the thickness of the thoracic  
262 aortic wall of the rats was significantly improved compared with the rats in the AT1-AA group (Suppl.  
263 Figure 5B). In addition, from recorded arterial blood pressure data of these model rats, we found that  
264 antagomir-339-3p can alleviate the increase in systolic and diastolic arterial blood pressure caused by  
265 AT1-AA (Suppl. Figure 5C). The above results suggested that inhibiting miR-339-3p can significantly  
266 reverse the vascular inflammation induced by AT1-AA.

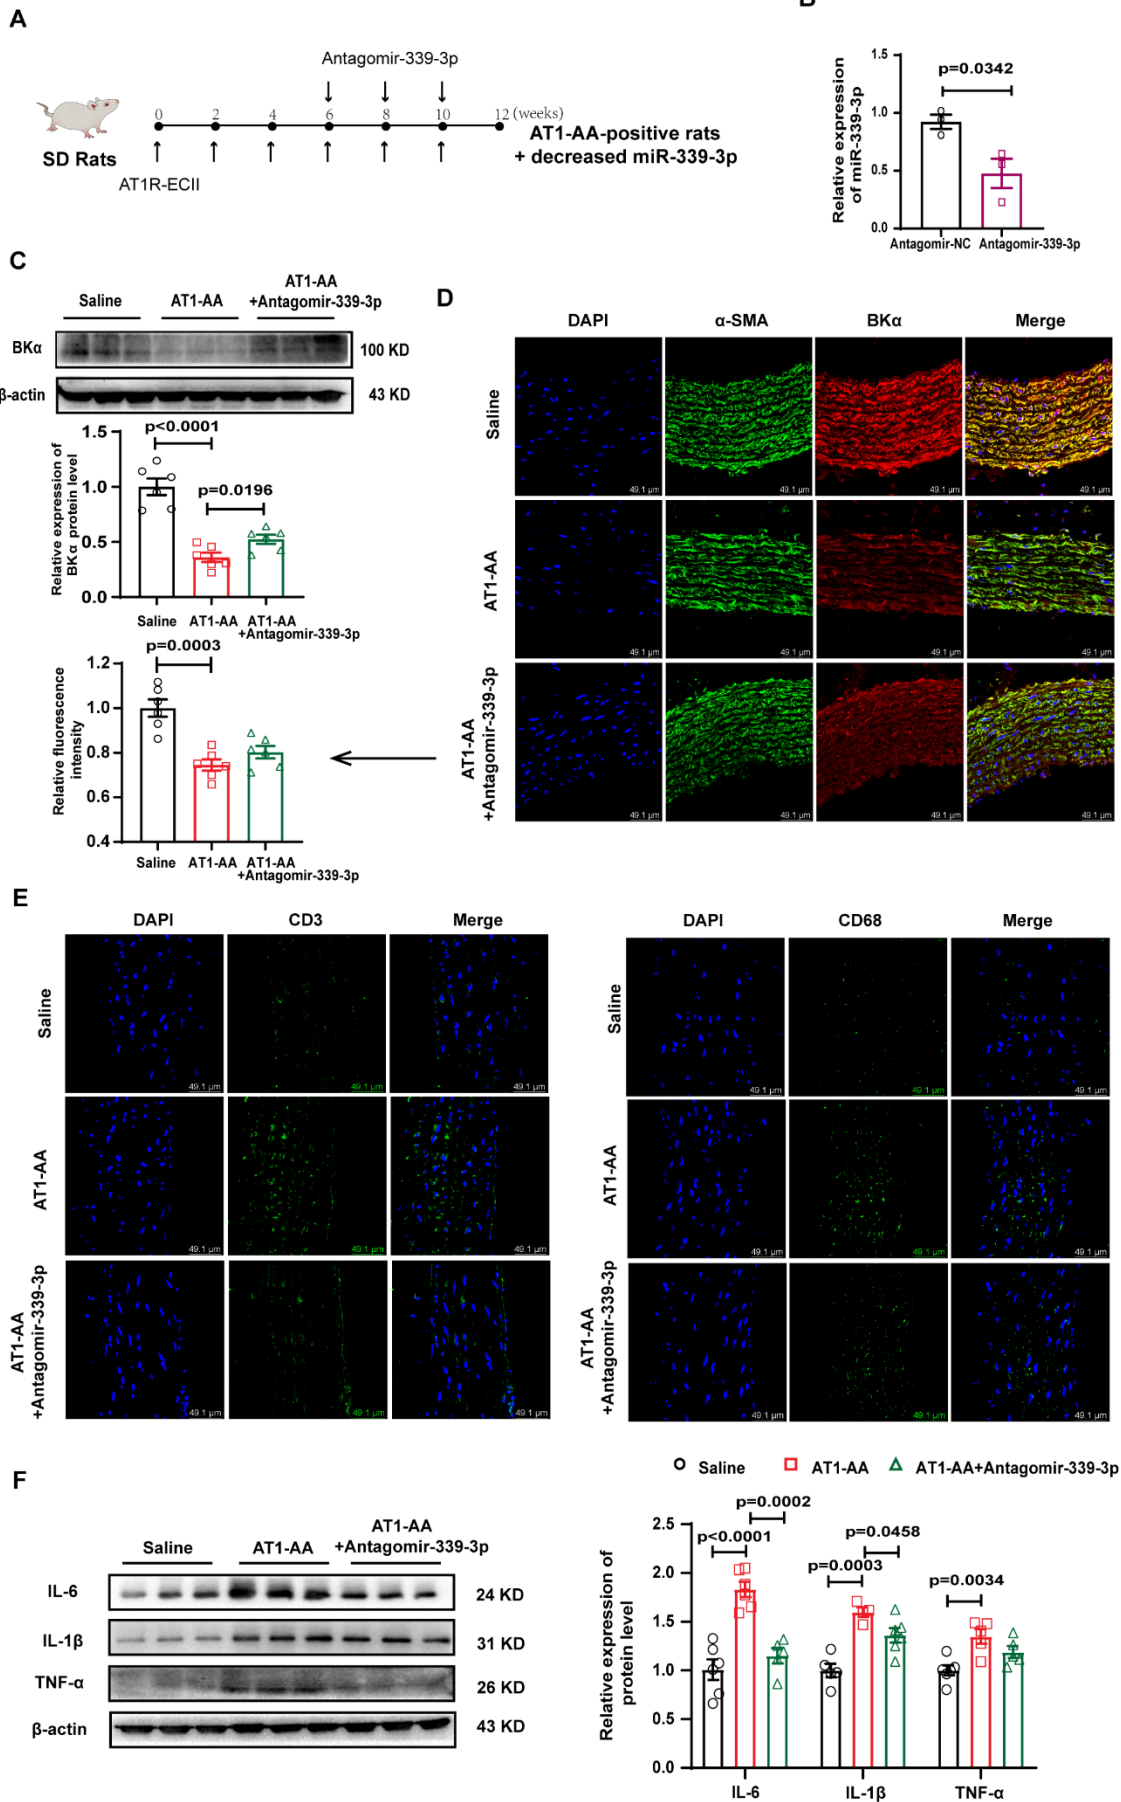

268 **Figure 6. Changes in AT1-AA-induced vascular inflammation after inhibiting miR-339-3p.** (A)  
269 Model animal production process. (B) The level of miR-339-3p in the thoracic aorta of SD rats  
270 injected with antagomir-339-3p was detected by RT-PCR, n=3. (C) Western blot and (D)  
271 immunofluorescence were used to detect changes in BK $\alpha$  protein levels in the thoracic aorta vascular  
272 wall of rats after injection of antagomir-339-3p into AT1-AA-positive rats, n=6. (E)  
273 Immunofluorescence was used to observe the surface marker molecules of AT1-AA-positive rat  
274 thoracic aortic inflammatory cells injected with antagomir-339-3p; bar=49  $\mu$ m. (F) Detection of the  
275 expression of the inflammatory cytokines IL-6, IL-1 $\beta$  and TNF- $\alpha$  in the vascular wall of the rat  
276 thoracic aorta after the injection of antagomir-339-3p in AT1-AA-positive rats by Western blot, n=5-6.  
277 The results of each sample were tested three times.

## 278 Discussion

279 In general, VSMCs play an important role in the inflammatory process of blood vessel walls. The  
280 role and mechanism of VSMCs in the inflammatory process of the aortic wall have not been fully  
281 elucidated. Once the body has an inflammatory response, blood vessels serve as conduits through  
282 various tissues and organs, which can cause more extensive pathological changes when inflamed, and  
283 deliver the produced inflammatory factors to various parts of the body [19]. In this study, we  
284 investigated the mechanism of AT1-AA-induced inflammation in the vascular wall, mainly in VSMCs,  
285 and attempt to identify new targets that may reverse inflammation in the vascular wall of AT1-AA-  
286 positive patients.

287 Excessive activation of AT1R on the surface of VSMCs has been found to be an important  
288 mechanism of vascular inflammation [20]. Using various drugs of the sartan family to inhibit AT1R  
289 can significantly reduce the occurrence of atherosclerosis in mice, rabbits and monkeys [21]. As a  
290 persistent agonist of AT1R, AT1-AA exists widely in the serum of patients with cardiovascular  
291 diseases such as hypertension and can cause excessive and continuous activation of AT1R by binding

292 to the extracellular second loop of the AT1 receptor (AT1R-ECII), which can directly damage  
293 endothelial cells and VSMCs, leading to an increase in transcription factors related to  
294 proinflammatory responses [22]. Once these transcription factors reach the vascular system, they  
295 drive and accelerate vascular inflammation [23, [24]. CD3, CD19 and CD68 are the surface markers  
296 of T cells, B cells and macrophages, respectively. However, during our experiment, it was found that  
297 CD3 and CD68 increased significantly in the blood vessel wall. Compared with this, the increase in  
298 CD19 expression was milder. Studies have shown that cellular immunity plays an important role in  
299 the pathogenesis of aortitis, and a large number of immune cells such as T cells, macrophages and  
300 natural killer cells are mainly infiltrated in the wall specimens of aortic arteritis [25]. IL-1 $\beta$  is a typical  
301 proinflammatory cytokine that induces the production of a broad spectrum of cytokines and  
302 chemokines, leading to the recruitment of various types of inflammatory cells [26]. The high  
303 expression of IL-1 $\beta$  precursor protein can indicate the initiation of inflammatory response [27].  
304 Interleukin-6 (IL-6) is induced by IL-1 and plays a central role in the process of inflammation, which  
305 is more sensitive and lasts longer than other cytokines. TNF- $\alpha$  is an effective proinflammatory  
306 cytokine that can regulate the expression of various proteins, such as IL-1 and IL-6 [28]. Increased  
307 expression of inflammatory cytokines in VSMCs and cell supernatants suggested that AT1-AA can  
308 cause inflammatory changes in VSMCs and aggravate vascular inflammation, but the specific  
309 mechanism is not fully understood.

310 Potassium channel disorders play a pivotal role in various diseases with significant inflammatory  
311 changes, such as systemic hypertension, diabetes, and atherosclerosis [29]. Potassium channels in  
312 smooth muscle cells (SMCs) have been reported to participate in the release of proinflammatory  
313 factors by SMCs and play an important role in the inflammatory pathological process of

314 atherosclerosis [30]. In recent years, an increasing number of potassium channels have become  
315 potential targets for the treatment of inflammatory diseases [31]. Calcium-activated potassium  
316 channels (KCa) are divided into large conductance (BKCa), intermediate conductance (IKCa) and  
317 small conductance (SKCa) types. Among these channels, BKCa is expressed mainly in VSMCs [32].  
318 BKCa channels (BK channels) are composed mainly of  $\alpha$  subunits that form pores and auxiliary  $\beta$   
319 subunits that regulate channel  $\text{Ca}^{2+}$  sensitivity, activity and structure, and they play an important role  
320 in regulating physiological processes, including smooth muscle tension and neuronal excitability [33].  
321 Studies have shown that blocking BK channel function can promote the occurrence and development  
322 of vascular inflammation, and the vascular inflammation caused by ischaemia-reperfusion is partially  
323 reversed after activation of the BK channel induced by NS1619 [5]. Our group previously found that  
324 AT1-AA can downregulate the function of BK channels and damage blood vessels [34]. In this  
325 experiment, we pretreated VSMCs with the BK channel agonist NS1619 to upregulate the function of  
326 the BK channel and then treated them with AT1-AA. We found that NS1619 indeed upregulated the  
327 activity of the BK channel (Suppl. Figure 2B) and partially reversed the vascular inflammation  
328 induced by AT1-AA (Suppl. Figure 2C) but could not achieve complete reversal, suggesting that in  
329 addition to the impairment of BK channel function, there are other factors that play an irreplaceable  
330 role in AT1-AA-induced vascular inflammation. Protein expression is a necessary condition for its  
331 function [35], and studies have shown that overactivation of AT1R leads to a decrease in the  
332 expression of BK channels [10], but it is not clear whether AT1-AA induces vascular inflammation by  
333 reducing the expression of BK channels. In this experiment, to clarify the specificity of AT1-AA  
334 decreasing BK $\alpha$ , we established a negative IgG group, an unrelated antibody group, namely, the  $\beta$ 1  
335 adrenergic receptor autoantibody ( $\beta$ 1-AA) group, and a positive group (Ang II), and found that only

336 AT1-AA can lower BK $\alpha$  protein levels (Suppl. Figure 2D).

337 To confirm the role of BK $\alpha$  in AT1-AA-induced vascular inflammation, we observed a significant  
338 increase in inflammatory cell infiltration in the thoracic aorta of BK $\alpha$ -knockout rats. However, we  
339 observed that the changes in systolic and diastolic arterial blood pressure in 5-month-old BK $\alpha$ -  
340 knockout rats were not obvious (Suppl. Figure 2E). Although vessels without BK channels may  
341 increase contractility due to calcium flow in VSMCs, we also found that the heart function of BK $\alpha$ -  
342 knockout rats was damaged, leading to cardiac contractility and ejection dysfunction. We speculate  
343 that this may be the reason why there was no significant change in arterial blood pressure in BK $\alpha$ -  
344 knockout rats. However, after BK $\alpha$  overexpressing adenovirus was injected into the tail vein of AT1-  
345 AA-positive rats, it was detected that the thoracic aortic wall thickness and arterial blood pressure of  
346 AT1-AA-positive rats had a reversal effect (Suppl. Figure 2L-M). Due to the technical difficulties in  
347 constructing conditional knockout rats, we used BK $\alpha$  global gene knockout rats in our experiment.  
348 With the development of technology, we constructed VSMC-specific knockout BK $\alpha$  rats and put them  
349 into followup experiments to prove that the loss of BK $\alpha$  in SMCs is an important cause of vascular  
350 inflammation.

351 It is very important to further explore the molecular mechanism of AT1-AA down-regulating the  
352 expression of BK $\alpha$  protein. Our experiments proved that AT1-AA does not affect the transcription  
353 level of BK $\alpha$  protein. In addition to transcription, posttranscriptional regulation and posttranslational  
354 modification may also be involved in the regulation of protein levels, in which posttranslational  
355 modification is an important factor affecting protein expression. Ubiquitin, as the most common type  
356 of posttranslational modification, is also an efficient and extensive pathway for protein degradation  
357 [36]. Some ubiquitin related enzymes involved in BK channel ubiquitination have been reported,

358 including F-box protein (FBXO) [37], with-no-lysinekinase-4 (WNK4) [38], muscle RING finger  
359 protein 1 (MuRF1) [39], and CRL4A (CRBN). Autophagy is also an important intracellular  
360 degradation system in which intracellular substances are transported to lysosomes and degraded in  
361 lysosomes, dynamically circulating intracellular energy and substances [40]. Apart from this, some  
362 proteins can also be degraded during apoptosis, including DNA damage repair enzymes, U1 small  
363 nuclear ribonucleoprotein components and actin, etc. With the experimental data, we observed that all  
364 three pathways are involved in AT1-AA-induced reduction of BK $\alpha$  channel expression in VSMCs, but  
365 in contrast, the ubiquitination pathway plays a more important role in this process (Figure. 4B and  
366 Suppl. Figure 3B), and therefore the degradation of the BK channel ubiquitination pathway was the  
367 focus of the present study.

368 The ubiquitin process is a three-enzyme cascade catalytic process that consists of E1-ubiquitin  
369 activating enzyme, E2-ubiquitin-binding enzyme and E3-ubiquitin ligase. The interaction between the  
370 E3-ubiquitin ligase and target protein is the core step of ubiquitin-mediated protein degradation [41].  
371 In the whole process, the main function of ubiquitin is to mark proteins that need to be decomposed so  
372 that they can be hydrolysed. In addition to labelling proteins present in the cytoplasm, ubiquitin can  
373 also label transmembrane proteins and remove them from the cell membrane [42]. In this experiment,  
374 we screened and identified different ubiquitin-related proteases directly connected to BK $\alpha$  through  
375 protein profiling methods on the vehicle group and the VSMCs treated with AT1-AA. The data were  
376 analysed by GO, and 32 proteins were found in the "protein binding" category after classification  
377 according to molecular function. The biological effects of these proteins were queried by the UniProt  
378 database (<https://www.UniProt.org/>), and only one of them was related to protein degradation (Suppl.  
379 Figure 3A). As a result, an E3-ubiquitin ligase named neural progenitor cells expressing

380 developmental downregulated 4-like proteins (NEDD4L or Nedd4-2) was screened out. The main  
381 targets of NEDD4L are membrane proteins, including ion channels and transporters [43]. NEDD4L  
382 has been reported to be able to negatively regulate the cell surface level of several ion channels,  
383 receptors and transporters involved in regulating neuronal excitability [44], targeting mainly voltage-  
384 gated sodium channels. Studies have shown that the WW functional domain of NEDD4L interacts  
385 with the PY functional domains of various subunits of ENaC, leading to the ubiquitination of ENaC  
386 and the endocytosis and degradation of ENaC from the cell membrane [45, [46]. Besides, knockout of  
387 NEDD4L can lead to high expression of epithelial Na<sup>+</sup> channels and eventually aggravate pulmonary  
388 inflammation [47], suggesting that NEDD4L is related to inflammation. So how does AT1-AA  
389 increase the protein level of NEDD4L?

390 The increase in mRNA translation is a direct link to the increase in protein levels, and mature  
391 microRNAs (miRNAs) can regulate the translation of target mRNA. There are increasing reports  
392 about the involvement of miRNAs in the regulation of the ubiquitin-proteasome system (UPS) [48,  
393 [49]. In most cases, miRNAs guide the silencing complex (RISC) to degrade mRNA or hinder its  
394 translation by pairing with the 3'UTR of the target gene mRNA base [50]. At the same time, some  
395 studies have shown that miRNAs can also bind to the 5'UTR of the target gene mRNA and promote  
396 the expression of the target gene [18]. In this study, we obtained the miRNA intersection of targeting  
397 human and rat NEDD4L 5'UTR and BK $\alpha$  3'UTR by bioinformatics and selected miR-339-3p as the  
398 target miRNA for follow-up verification. According to existing research, miR-339-3p is closely  
399 related to the proliferation, migration and invasion of all kinds of cancer cells [51], but its regulatory  
400 effect on the UPS has not been reported. This study conclusively confirmed that miR-339-3p targets  
401 both the 5'UTR of NEDD4L as well as the 3'UTR of BK $\alpha$ , both achieving reduced BK $\alpha$  protein



402 expression and exacerbating vascular inflammation. We innovatively demonstrate that a single  
403 miRNA can simultaneously target different regions of two proteins and lead to subsequent cascade  
404 amplification.

## 405 **Conclusion**

406 This study demonstrated that the reduction in BK $\alpha$  protein was the key mechanism of vascular  
407 inflammation induced by AT1-AA, and the high expression of the E3-ubiquitin ligase NEDD4L was  
408 involved in the downregulation of BK $\alpha$  by AT1-AA. MiR-339-3p played an irreplaceable role in both  
409 high expression of NEDD4L and low expression of BK $\alpha$ , aggravating the vascular inflammation  
410 induced by AT1-AA. From the point of view of ubiquitin degradation and miRNA regulation, this  
411 study searched for the molecular mechanism of the AT1-AA-induced downregulation of BK $\alpha$  protein  
412 expression in VSMCs and tried to provide a new possible treatment for vascular inflammation-related  
413 diseases aggravated by the vascular smooth muscle cell inflammatory phenotype in AT1-AA-positive  
414 patients.

## 415 **Materials and methods**

### 416 **Establishment of model animals**

417 Two-hundred-gram 8-week-old male Sprague-Dawley rats were used in the experiment. AT1R-  
418 ECII (0.4  $\mu\text{g/g}$ ) was injected subcutaneously into the back neck every two weeks to complete active  
419 immunization, which lasted for three months. Ad-BK $\alpha$ -GFP ( $1 \times 10^{10}$  pfu/kg) and antagomir-339-3p  
420 (20 nmol/rat) injection started in the 6<sup>th</sup> week of active immunization, and intravenous injection into  
421 the rat tail was administered every two weeks until the end of active immunization. All animals used  
422 in the experiment were approved by the Animal Protection Ethics Committee of Capital Medical

423 University (Ethics Number: AEEI-2014-062). Finally, the tissue was removed after intraperitoneal  
424 injection of 20% pentobarbital sodium at a dose of 40 mg/kg.

#### 425 **Functional testing**

426 A BP-98A animal noninvasive sphygmomanometer (Softron, Japan) was used to monitor the blood  
427 pressure of awake model rats. Before formally testing and recording the testing data, the model  
428 animals were allowed to adapt to the pressure stimulation of the sphygmomanometer tail cuff every  
429 day for one week in advance. Then the arterial blood pressure of the model rats can be monitored.

430 After anaesthetizing the model rats with 3% isoflurane, a Vevo LAB small animal ultrasound  
431 system (Visualsonics, USA) was used to detect the vascular wall thickness and lumen diameter of the  
432 thoracic aortas of the model rats.

#### 433 **Primary culture and subculture**

434 VSMCs were cultured in low glucose DMEM containing 1% penicillin streptomycin and 10%  
435 foetal bovine serum. Human embryonic kidney 293A (HEK293A) cells were purchased from ATCC  
436 (Manassas, VA) and cultured in high glucose DMEM containing 10% foetal bovine serum. All cells  
437 were cultured in a 37°C, 5% CO<sub>2</sub> cell incubator. All types of cells need to be passaged approximately  
438 every 48 h, and before various treatments, cells need to be cultured in serum-free medium for 24 h.

#### 439 **Enzyme-linked immunosorbent assay (ELISA)**

440 The content of the target inflammatory cytokine in the test sample was detected by kits (Invitrogen,  
441 88-50625, 88-6010, 88-7340, USA). The sample to be tested was incubated with a biotin-labelled  
442 antibody, avidin-labelled HRP, and substrates A and B. Finally, stop solution was added. The colour  
443 depth of the liquid is proportional to the concentration of the substance to be tested in the sample.

444 The OD value of AT1-AA in the serum of actively immunized rats needs to be tested regularly to

445 confirm the success of active immunization. The bottom of the 96-well plate was coated with AT1R  
446 extracellular second loop antigen peptide in advance and placed at 4°C overnight. The subsequent  
447 steps are similar to the kit process.

#### 448 **Western blotting**

449 The cell and tissue protein concentrations were evaluated by a BCA protein detection kit (Thermo,  
450 23227, America). A 10% or 12% SDS-PAGE gel was used to separate the target protein from the total  
451 protein (20 µg) and then transferred the target protein to a PVDF membrane. The cells were blocked  
452 with 5% skimmed milk at room temperature for 1 h and then incubated with the corresponding  
453 primary antibody at 4°C overnight. After washing with TBST the next day, the PVDF membranes  
454 were incubated with 1:4000 diluted secondary antibody and developed with ECL reagent after  
455 washing with TBST.

#### 456 **RT-PCR**

457 TRIzol and RNA extraction kits were used to extract total mRNA and microRNA from vascular  
458 tissue or cultured VSMCs, and reverse transcription into cDNA was performed using a reverse  
459 transcription system (Thermo, K1622, USA for total mRNA and GenePharma, China for microRNA).  
460 Next, cDNA was amplified according to the amplification system. Finally, the content of amplified  
461 genes in the original sample was calculated and analysed based on the Ct value in the amplification  
462 result.

#### 463 **Transfection of plasmid, miRNA and siRNA**

464 The NEDD4L-5'UTR and BKα-3'UTR plasmids were entrusted to Beijing Likely Biotechnology  
465 Co., Ltd., and their sequences were inserted into the psi-check 2 dual luciferase miRNA target  
466 expression vector (Suppl. Figure 4a). Gene Pharma designed and synthesized the miR-339-3p mimic,

467 miR-339-3p inhibitor, control irrelevant sequences, and BK $\alpha$  and NEDD4L siRNA sequences.  
468 Transfection was performed with Lipofectamine 2000, and after 6 h of transfection, the cells were  
469 cultured in serum-free DMEM. The lysed cells were finally collected after the relevant operations  
470 were performed according to the experimental requirements, and Western blotting, RT-PCR and dual  
471 luciferase activity detection were performed.

#### 472 **Coimmunoprecipitation**

473 The protein volume required by the experimental system based on the protein concentration was  
474 calculated, antibodies and protease inhibitors were added and mixed thoroughly at 4°C for 1 h. Then,  
475 agarose beads were added and mixed thoroughly overnight at 4°C. The next day, the agarose beads  
476 were washed repeatedly with buffer at 4°C. Finally, after discarding the buffer, the agarose beads were  
477 boiled with an equal volume of 2 $\times$  loading mixture, the protein was separated by SDS-PAGE, and the  
478 target protein was detected with the corresponding antibody.

#### 479 **Protein mass spectrometry**

480 The protein-bound agarose beads obtained by coimmunoprecipitation were sent to the company for  
481 protein spectroscopy detection (Suppl. Excel).

#### 482 **Immunofluorescence**

483 Paraffin sections of the thoracic aorta of model rats were used for immunofluorescence staining.  
484 After the sections were deparaffinized and hydrated, the antigen was repaired by the high-pressure  
485 method, blocked with 10% goat serum, and then incubated with primary antibodies against BK $\alpha$   
486 (Alomone Labs, APC-107, Israel), BK $\beta$ 1 (Alomone Labs, APC-036, Israel), CD3 (Abcam, ab5690,  
487 UK), CD19 (Bioss, bs-0079R, China), CD68 (Affinity Biosciences., DF7518, USA) and  $\alpha$ -SMA  
488 (Abcam, ab7817, UK) at 4°C overnight. VSMCs were fixed in 4% paraformaldehyde for 10 min at

489 room temperature. After washing with PBS, the smooth muscle cells were also blocked with 10% goat  
490 serum. Finally, the cells were incubated in NEDD4L and  $\alpha$ -SMA primary antibodies at 4°C overnight.  
491 The next day, the paraffin sections and cells were washed with PBS and incubated with a fluorescein-  
492 conjugated secondary antibody for 1 h at 37°C. After thorough washing, the tablets were sealed with a  
493 sealing solution containing DAPI. The image was acquired with a confocal microscope.

#### 494 **Fluorescence in situ hybridization (FISH)**

495 For miR-339-3p fluorescence in situ hybridization (FISH), cells were fixed in 4%  
496 paraformaldehyde for 15 min at room temperature and washed with PBS after infiltration with 0.1%  
497 Triton X-100. The process was carried out using a Gene Pharma fluorescence in situ hybridization kit.  
498 Then, according to the operation procedure of the kit, the miR-339-3p red fluorescent (5' end and 3'  
499 end were both labelled with CY3) probe was used to detect the expression of miR-339-3p in VSMCs.

#### 500 **Dual-luciferase reporter assay**

501 The test was performed according to the operating instructions of the dual luciferase activity test kit  
502 (Vazyme Biotech, DL101-01, USA). The reagents in the kit were diluted and prepared in advance.  
503 After washing the cells with PBS, 100  $\mu$ l diluted lysis buffer was added to each well, and the culture  
504 plate was shaken with a shaker for 15 min at room temperature. The lysate was centrifuged, 20  $\mu$ l  
505 supernatant was added to each well of the test plate, 100  $\mu$ l Luciferase Assay Buffer II (LAR II) was  
506 added to detect firefly luciferase activity, and 100  $\mu$ l stop solution was added to detect Renilla  
507 luciferase activity. The ratio of the fluorescence intensity of fireflies to the fluorescence intensity of  
508 Renilla reflects the relative fluorescence value of each group.

#### 509 **Selection of AT1-AA monoclonal antibody cell line**

510 The hybridoma cells were made from the human AT1R extracellular second loop sequence. The

511 hybridoma cells in good condition and able to bind to the extracellular second loop of AT1R were  
512 injected into the abdomen of mice to produce ascites. After AT1-AA extraction, the purity and activity  
513 of the resulting ascites were detected, including the detection of antibody light and heavy chain (Suppl.  
514 Figure 1D), increased beating of neonatal rat cardiomyocytes (Suppl. Figure 1E) and vascular ring  
515 detection of vasoconstriction (Suppl. Figure 1F). Finally, select the cell line that allows mice to  
516 produce active AT1-AA for follow-up research.

#### 517 **Preparation of monoclonal AT1-AA**

518 The selected hybridoma cells are cultured, and monoclonal AT1-AA is obtained from the culture  
519 supernatant. Hybridoma cells were grown in 1640 RPMI medium containing 8% fetal bovine serum.  
520 Select hybridoma cells with good growth status and suitable growth rate, and collect the culture  
521 supernatant by centrifugation. The culture supernatant of hybridoma cells was filtered with 0.45  $\mu\text{m}$   
522 filters, and the IgG in the culture supernatant of hybridoma cells was purified with a protein G affinity  
523 chromatography column, which is the AT1-AA required for our experiment.

#### 524 **Isolation and identification of circulating extracellular vesicles in rats**

525 Ultracentrifugation is the most commonly used method for purification of extracellular vesicles.  
526 Use low-speed centrifugation and high-speed centrifugation to alternately separate vesicles of similar  
527 size. The whole process includes centrifugation at 300 g for 10 min, centrifugation at 2000 g for 10  
528 min, and centrifugation at 10,000 g for 30 min. So far, the supernatant has been retained at each step.  
529 Finally, the supernatant was collected, centrifuged at 100,000 g for 70 min, and centrifuged twice to  
530 collect the precipitate. The precipitate was an extracellular vesicle. The extracted extracellular vesicles  
531 were observed under electron microscope, the particle diameter was detected by Nanoparticle  
532 Tracking Analysis (NTA), and the surface markers CD9, CD81 and calnexin of the extracellular

533 vesicles were detected to identify the isolated particles as extracellular vesicles.

#### 534 **Statistical Analysis**

535 We used GraphPad Prism 8 and SPSS 26 software to draw and analyse the data. All the data are  
536 presented as the mean  $\pm$  standard error (SEM). The differences in normally distributed data were  
537 analysed using independent sample *t*-tests (two groups) or one-way ANOVA (> 2 groups). Pearson test  
538 is used for correlation analysis. A value of  $p < 0.05$  was considered statistically significant.

#### 539 **Sources of Funding**

540 This work was supported by the National Natural Science Foundation of China (No. 31771267,  
541 81800425), Beijing Natural Science Foundation Program and Scientific Research Key Program of  
542 Beijing Municipal Commission of Education (KZ201810025039).

#### 543 **References**

- 544 1. Kroller-Schon S, Jansen T, Tran TLP, Kvandova M, Kalinovic S, Oelze M, Keaney JF, Jr., Foretz M,  
545 Viollet B, Daiber A, Kossmann S, Lagrange J, Frenis K, Wenzel P, Munzel T, Schulz E. Endothelial  
546  $\alpha$ 1AMPK modulates angiotensin II-mediated vascular inflammation and dysfunction. *Basic Res*  
547 *Cardiol* 2019; 114: 8.
- 548 2. Gao Y, Yang Y, Guan Q, Pang X, Zhang H, Zeng D. IL-1 $\beta$  modulate the Ca<sup>2+</sup>-activated big-  
549 conductance K channels (BK) via reactive oxygen species in cultured rat aorta smooth muscle cells.  
550 *Mol Cell Biochem* 2010; 338: 59-68.
- 551 3. Tykocki NR, Boerman EM, Jackson WF. Smooth Muscle Ion Channels and Regulation of Vascular  
552 Tone in Resistance Arteries and Arterioles. *Compr Physiol* 2017; 7: 485-581.
- 553 4. Jackson WF. Potassium Channels in Regulation of Vascular Smooth Muscle Contraction and

- 554 Growth. *Adv Pharmacol* 2017; 78: 89-144.
- 555 5. Dai H, Wang M, Patel PN, Kalogeris T, Liu Y, Durante W, Korthuis RJ. Preconditioning with the  
556 BKCa channel activator NS-1619 prevents ischemia-reperfusion-induced inflammation and mucosal  
557 barrier dysfunction: roles for ROS and heme oxygenase-1. *Am J Physiol Heart Circ Physiol* 2017; 313:  
558 H988-H999.
- 559 6. Zyrianova T, Lopez B, Liao A, Gu C, Wong L, Ottolia M, Olcese R, Schwingshackl A. BK  
560 Channels Regulate LPS-induced CCL-2 Release from Human Pulmonary Endothelial Cells. *Am J*  
561 *Respir Cell Mol Biol* 2021; 64: 224-234.
- 562 7. Parlar A, Arslan SO, Cam SA. Glabridin Alleviates Inflammation and Nociception in Rodents by  
563 Activating BKCa Channels and Reducing NO Levels. *Biol Pharm Bull* 2020; 43: 884-897.
- 564 8. Zhuang J, Zhang X, Wang D, Li J, Zhou B, Shi Z, Gu D, Denson DD, Eaton DC, Cai H. WNK4  
565 kinase inhibits Maxi K channel activity by a kinase-dependent mechanism. *Am J Physiol Renal*  
566 *Physiol* 2011; 301: F410-419.
- 567 9. Yue P, Zhang C, Lin DH, Sun P, Wang WH. WNK4 inhibits Ca(2+)-activated big-conductance  
568 potassium channels (BK) via mitogen-activated protein kinase-dependent pathway. *Biochim Biophys*  
569 *Acta* 2013; 1833: 2101-2110.
- 570 10. Zhang ZY, Qian LL, Wang RX. Molecular Mechanisms Underlying Renin-Angiotensin-  
571 Aldosterone System Mediated Regulation of BK Channels. *Front Physiol* 2017; 8: 698.
- 572 11. Leo MD, Bulley S, Bannister JP, Kuruvilla KP, Narayanan D, Jaggar JH. Angiotensin II stimulates  
573 internalization and degradation of arterial myocyte plasma membrane BK channels to induce  
574 vasoconstriction. *Am J Physiol Cell Physiol* 2015; 309: C392-402.
- 575 12. Yu Y, Zhang L, Xu G, Wu Z, Li Q, Gu Y, Niu J. Angiotensin II Type I Receptor Agonistic



- 576 Autoantibody Induces Podocyte Injury via Activation of the TRPC6- Calcium/Calcineurin Pathway in  
577 Pre-Eclampsia. *Kidney Blood Press Res* 2018; 43: 1666-1676.
- 578 13. Liu C, Kellems RE, Xia Y. Inflammation, Autoimmunity, and Hypertension: The Essential Role of  
579 Tissue Transglutaminase. *Am J Hypertens* 2017; 30: 756-764.
- 580 14. Li W, Chen Y, Li S, Guo X, Zhou W, Zeng Q, Liao Y, Wei Y. Agonistic antibody to angiotensin II  
581 type 1 receptor accelerates atherosclerosis in ApoE<sup>-/-</sup> mice. *Am J Transl Res* 2014; 6: 678-690.
- 582 15. Yan J, Du F, Li SD, Yuan Y, Jiang JY, Li S, Li XY, Du ZX. AUF1 modulates TGF-beta signal in  
583 renal tubular epithelial cells via post-transcriptional regulation of Nedd4L expression. *Biochim*  
584 *Biophys Acta Mol Cell Res* 2018; 1865: 48-56.
- 585 16. Song JY, Wang XG, Zhang ZY, Che L, Fan B, Li GY. Endoplasmic reticulum stress and the  
586 protein degradation system in ophthalmic diseases. *PeerJ* 2020; 8: e8638.
- 587 17. Macek B, Forchhammer K, Hardouin J, Weber-Ban E, Grangeasse C, Mijakovic I. Protein post-  
588 translational modifications in bacteria. *Nat Rev Microbiol* 2019; 17: 651-664.
- 589 18. Orom UA, Nielsen FC, Lund AH. MicroRNA-10a binds the 5'UTR of ribosomal protein mRNAs  
590 and enhances their translation. *Mol Cell* 2008; 30: 460-471.
- 591 19. Potente M, Gerhardt H, Carmeliet P. Basic and therapeutic aspects of angiogenesis. *Cell* 2011; 146:  
592 873-887.
- 593 20. Imayama I, Ichiki T, Patton D, Inanaga K, Miyazaki R, Ohtsubo H, Tian Q, Yano K, Sunagawa K.  
594 Liver X receptor activator downregulates angiotensin II type 1 receptor expression through  
595 dephosphorylation of Sp1. *Hypertension* 2008; 51: 1631-1636.
- 596 21. Lu H, Balakrishnan A, Howatt DA, Wu C, Charnigo R, Liao G, Cassis LA, Daugherty A.  
597 Comparative effects of different modes of renin angiotensin system inhibition on

- 598 hypercholesterolaemia-induced atherosclerosis. *Br J Pharmacol* 2012; 165: 2000-2008.
- 599 22. Pearl MH, Zhang Q, Palma Diaz MF, Grotts J, Rossetti M, Elashoff D, Gjertson DW, Weng P,  
600 Reed EF, Tsai Chambers E. Angiotensin II Type 1 receptor antibodies are associated with  
601 inflammatory cytokines and poor clinical outcomes in pediatric kidney transplantation. *Kidney Int*  
602 2018; 93: 260-269.
- 603 23. Anders HJ, Baumann M, Tripepi G, Mallamaci F. Immunity in arterial hypertension: associations  
604 or causalities? *Nephrol Dial Transplant* 2015; 30: 1959-1964.
- 605 24. Ibrahim T, Przybyl L, Harmon AC, Amaral LM, Faulkner JL, Cornelius DC, Cunningham MW,  
606 Hunig T, Herse F, Wallukat G, Dechend R, LaMarca B. Proliferation of endogenous regulatory T cells  
607 improve the pathophysiology associated with placental ischaemia of pregnancy. *Am J Reprod*  
608 *Immunol* 2017; 78.
- 609 25. Arnaud L, Haroche J, Limal N, Toledano D, Gambotti L, Chalumeau NC, Boutin D, Cacoub P,  
610 Cluzel P, Koskas F, Kieffer E, Piette JC, Amoura Z. Takayasu arteritis in France: a single-center  
611 retrospective study of 82 cases comparing white, North African, and black patients. *Medicine*  
612 (Baltimore) 2010; 89: 1-17.
- 613 26. Kleemann R, Zadelaar S, Kooistra T. Cytokines and atherosclerosis: a comprehensive review of  
614 studies in mice. *Cardiovasc Res* 2008; 79: 360-376.
- 615 27. Lopez-Castejon G, Brough D. Understanding the mechanism of IL-1beta secretion. *Cytokine*  
616 *Growth Factor Rev* 2011; 22: 189-195.
- 617 28. Cordingley FT, Bianchi A, Hoffbrand AV, Reittie JE, Heslop HE, Vyakarnam A, Turner M,  
618 Meager A, Brenner MK. Tumour necrosis factor as an autocrine tumour growth factor for chronic B-  
619 cell malignancies. *Lancet* 1988; 1: 969-971.

- 620 29. Korovkina VP, England SK. Detection and implications of potassium channel alterations. *Vascul*  
621 *Pharmacol* 2002; 38: 3-12.
- 622 30. Sahranavard T, Carbone F, Montecuccio F, Xu S, Al-Rasadi K, Jamialahmadi T, Sahebkar A. The  
623 role of potassium in atherosclerosis. *Eur J Clin Invest* 2021; 51: e13454.
- 624 31. Pelletier L, Savignac M. Involvement of ion channels in allergy. *Curr Opin Immunol* 2018; 52: 60-  
625 67.
- 626 32. Cheng J, Wen J, Wang N, Wang C, Xu Q, Yang Y. Ion Channels and Vascular Diseases.  
627 *Arterioscler Thromb Vasc Biol* 2019; 39: e146-e156.
- 628 33. Bukiya AN, Dopico AM. Regulation of BK Channel Activity by Cholesterol and Its Derivatives.  
629 *Adv Exp Med Biol* 2019; 1115: 53-75.
- 630 34. Wang P, Zhang S, Ren J, Yan L, Bai L, Wang L, Wang P, Bian J, Yin X, Liu H. The inhibitory  
631 effect of BKCa channels induced by autoantibodies against angiotensin II type 1 receptor is  
632 independent of AT1R. *Acta Biochim Biophys Sin (Shanghai)* 2018; 50: 560-566.
- 633 35. Dyson MR. Fundamentals of Expression in Mammalian Cells. *Adv Exp Med Biol* 2016; 896: 217-  
634 224.
- 635 36. Ciechanover A. The ubiquitin proteolytic system: from a vague idea, through basic mechanisms,  
636 and onto human diseases and drug targeting. *Neurology* 2006; 66: S7-19.
- 637 37. Zhang DM, He T, Katusic ZS, Lee HC, Lu T. Muscle-specific f-box only proteins facilitate bk  
638 channel beta(1) subunit downregulation in vascular smooth muscle cells of diabetes mellitus. *Circ Res*  
639 2010; 107: 1454-1459.
- 640 38. Wang Z, Subramanya AR, Satlin LM, Pastor-Soler NM, Carattino MD, Kleyman TR. Regulation  
641 of large-conductance Ca<sup>2+</sup>-activated K<sup>+</sup> channels by WNK4 kinase. *Am J Physiol Cell Physiol* 2013;

- 642 305: C846-853.
- 643 39. Yi F, Wang H, Chai Q, Wang X, Shen WK, Willis MS, Lee HC, Lu T. Regulation of large  
644 conductance Ca<sup>2+</sup>-activated K<sup>+</sup> (BK) channel beta1 subunit expression by muscle RING finger  
645 protein 1 in diabetic vessels. *J Biol Chem* 2014; 289: 10853-10864.
- 646 40. Mizushima N, Komatsu M. Autophagy: renovation of cells and tissues. *Cell* 2011; 147: 728-741.
- 647 41. Morreale FE, Walden H. Types of Ubiquitin Ligases. *Cell* 2016; 165: 248-248 e241.
- 648 42. Hor S, Ziv T, Admon A, Lehner PJ. Stable isotope labeling by amino acids in cell culture and  
649 differential plasma membrane proteome quantitation identify new substrates for the MARCH9  
650 transmembrane E3 ligase. *Mol Cell Proteomics* 2009; 8: 1959-1971.
- 651 43. Manning JA, Kumar S. Physiological Functions of Nedd4-2: Lessons from Knockout Mouse  
652 Models. *Trends Biochem Sci* 2018; 43: 635-647.
- 653 44. Dibbens LM, Ekberg J, Taylor I, Hodgson BL, Conroy SJ, Lensink IL, Kumar S, Zielinski MA,  
654 Harkin LA, Sutherland GR, Adams DJ, Berkovic SF, Scheffer IE, Mulley JC, Poronnik P. NEDD4-2  
655 as a potential candidate susceptibility gene for epileptic photosensitivity. *Genes Brain Behav* 2007; 6:  
656 750-755.
- 657 45. Dinudom A, Harvey KF, Komwatana P, Young JA, Kumar S, Cook DI. Nedd4 mediates control of  
658 an epithelial Na<sup>+</sup> channel in salivary duct cells by cytosolic Na<sup>+</sup>. *Proc Natl Acad Sci U S A* 1998; 95:  
659 7169-7173.
- 660 46. Bongiorno D, Schuetz F, Poronnik P, Adams DJ. Regulation of voltage-gated ion channels in  
661 excitable cells by the ubiquitin ligases Nedd4 and Nedd4-2. *Channels (Austin)* 2011; 5: 79-88.
- 662 47. Kimura T, Kawabe H, Jiang C, Zhang W, Xiang YY, Lu C, Salter MW, Brose N, Lu WY, Rotin D.  
663 Deletion of the ubiquitin ligase Nedd4L in lung epithelia causes cystic fibrosis-like disease. *Proc Natl*

664 Acad Sci U S A 2011; 108: 3216-3221.

665 48. Baumgarten A, Bang C, Tschirner A, Engelmann A, Adams V, von Haehling S, Doehner W, Pregla  
666 R, Anker MS, Blecharz K, Meyer R, Hetzer R, Anker SD, Thum T, Springer J. TWIST1 regulates the  
667 activity of ubiquitin proteasome system via the miR-199/214 cluster in human end-stage dilated  
668 cardiomyopathy. *Int J Cardiol* 2013; 168: 1447-1452.

669 49. Qiu J, Zhu J, Zhang R, Liang W, Ma W, Zhang Q, Huang Z, Ding F, Sun H. miR-125b-5p  
670 targeting TRAF6 relieves skeletal muscle atrophy induced by fasting or denervation. *Ann Transl Med*  
671 2019; 7: 456.

672 50. Bartel DP. MicroRNAs: target recognition and regulatory functions. *Cell* 2009; 136: 215-233.

673 51. Weber CE, Luo C, Hotz-Wagenblatt A, Gardyan A, Kordass T, Holland-Letz T, Osen W,  
674 Eichmuller SB. miR-339-3p Is a Tumor Suppressor in Melanoma. *Cancer Res* 2016; 76: 3562-3571.

675

676

677 **Supplementary Material**

678 Supplementary figures are visible in additional documentation.

## 1 Supplementary Information

## 2 Supplementary figures and figure legends

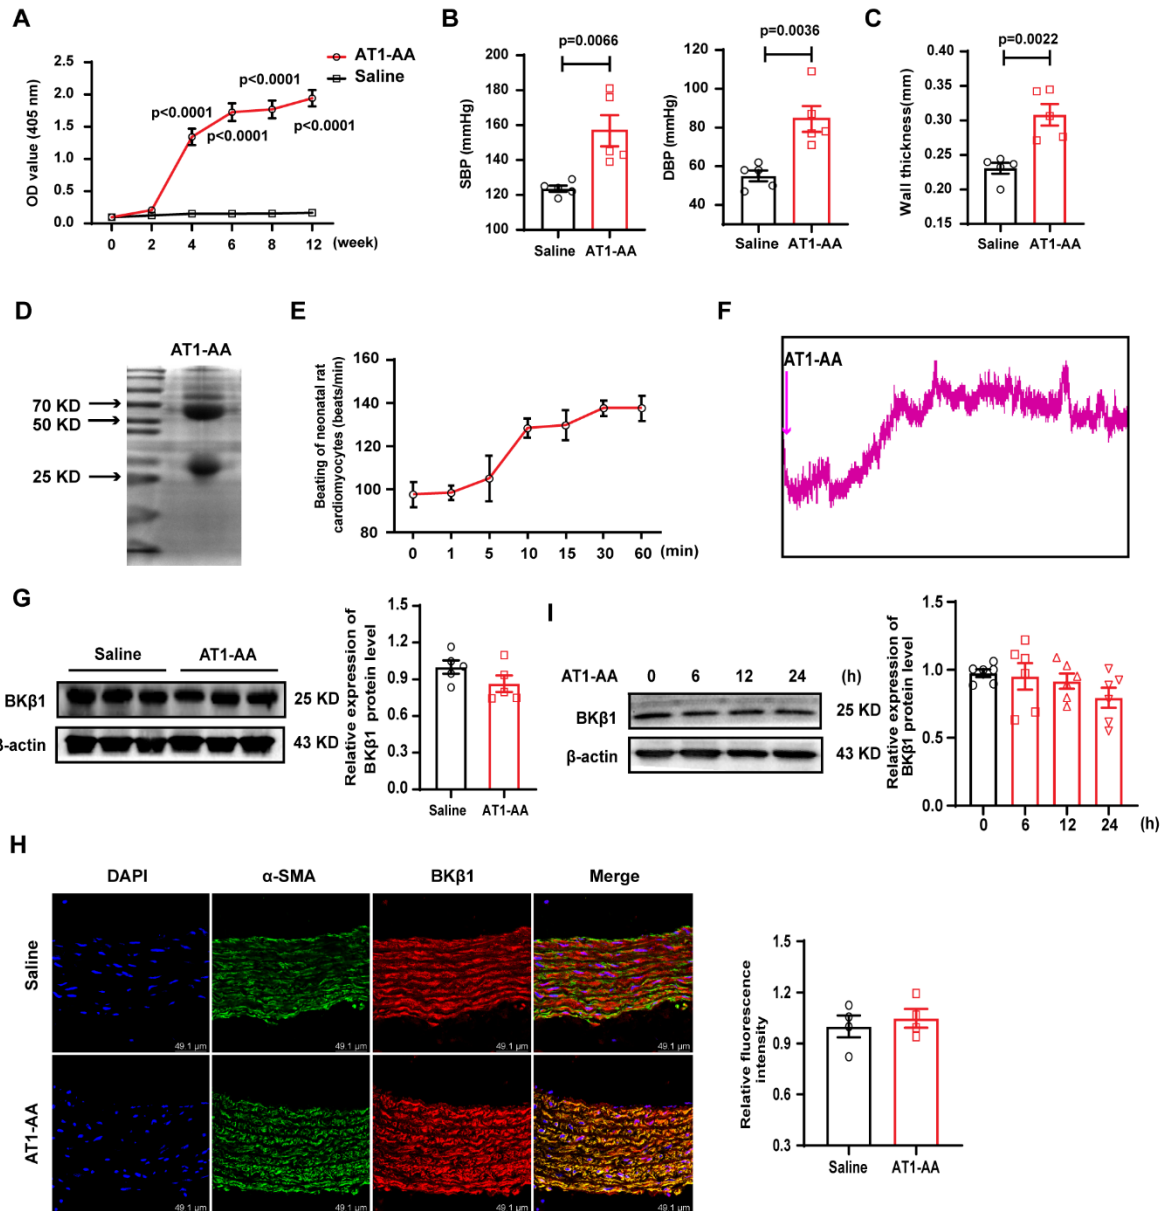

3

4 **Suppl. Figure 1 Successful establishment of AT1-AA-positive model does not affect the**  
5 **expression of BKβ1 protein.** (A) 12 weeks after active immunization with AT1R-ECII, the OD value  
6 of serum AT1-AA in rats was detected. Detection of (B) caudal vein blood pressure and (C) vascular  
7 wall thickness of thoracic aorta in AT1-AA-positive rats, n=5. (D) The light and heavy chains of  
8 AT1-AA isolated by SDS-PAGE gel. (E) Effect of AT1-AA on the beating of neonatal rat

- 1 cardiomyocytes. (F) The effect of AT1-AA on vasomotion was detected by vascular ring. Detection of
- 2 BK $\beta$ 1 protein level in (G) thoracic aorta of AT1-AA-positive rats and (I) VSMCs treated with
- 3 AT1-AA, n=5. (H) Detection of BK $\beta$ 1 protein level in thoracic aorta of AT1-AA-positive rats by
- 4 immunofluorescence method, n=4.



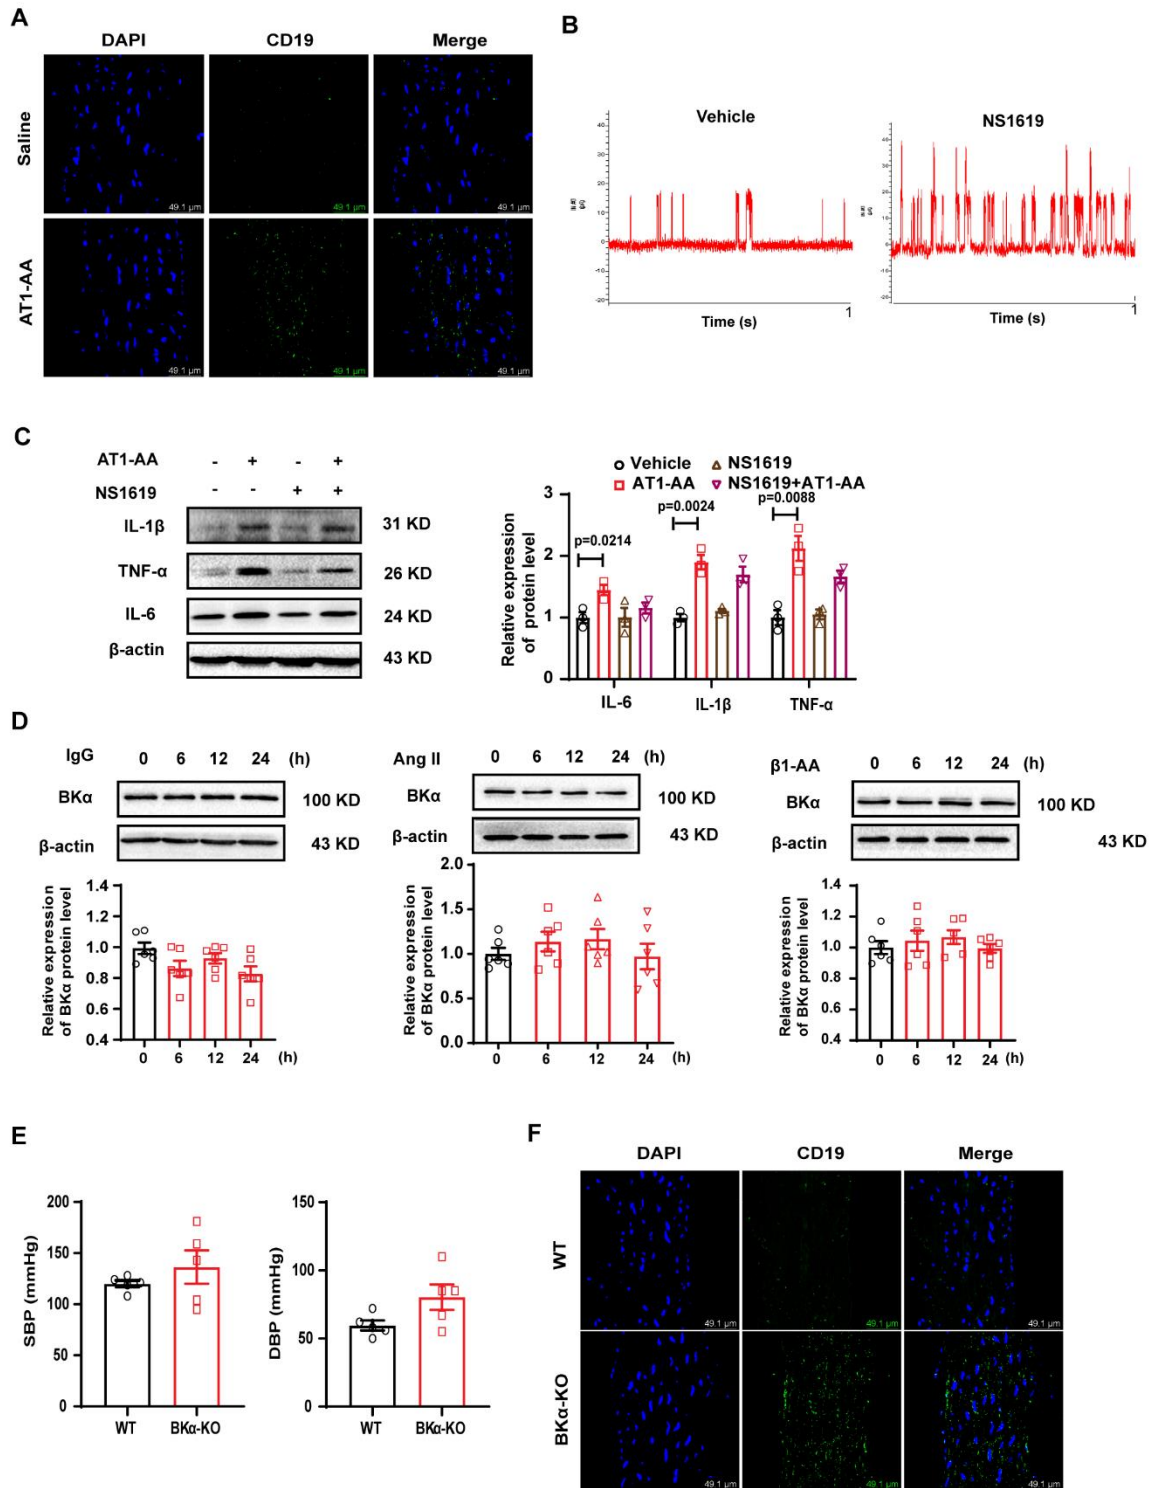

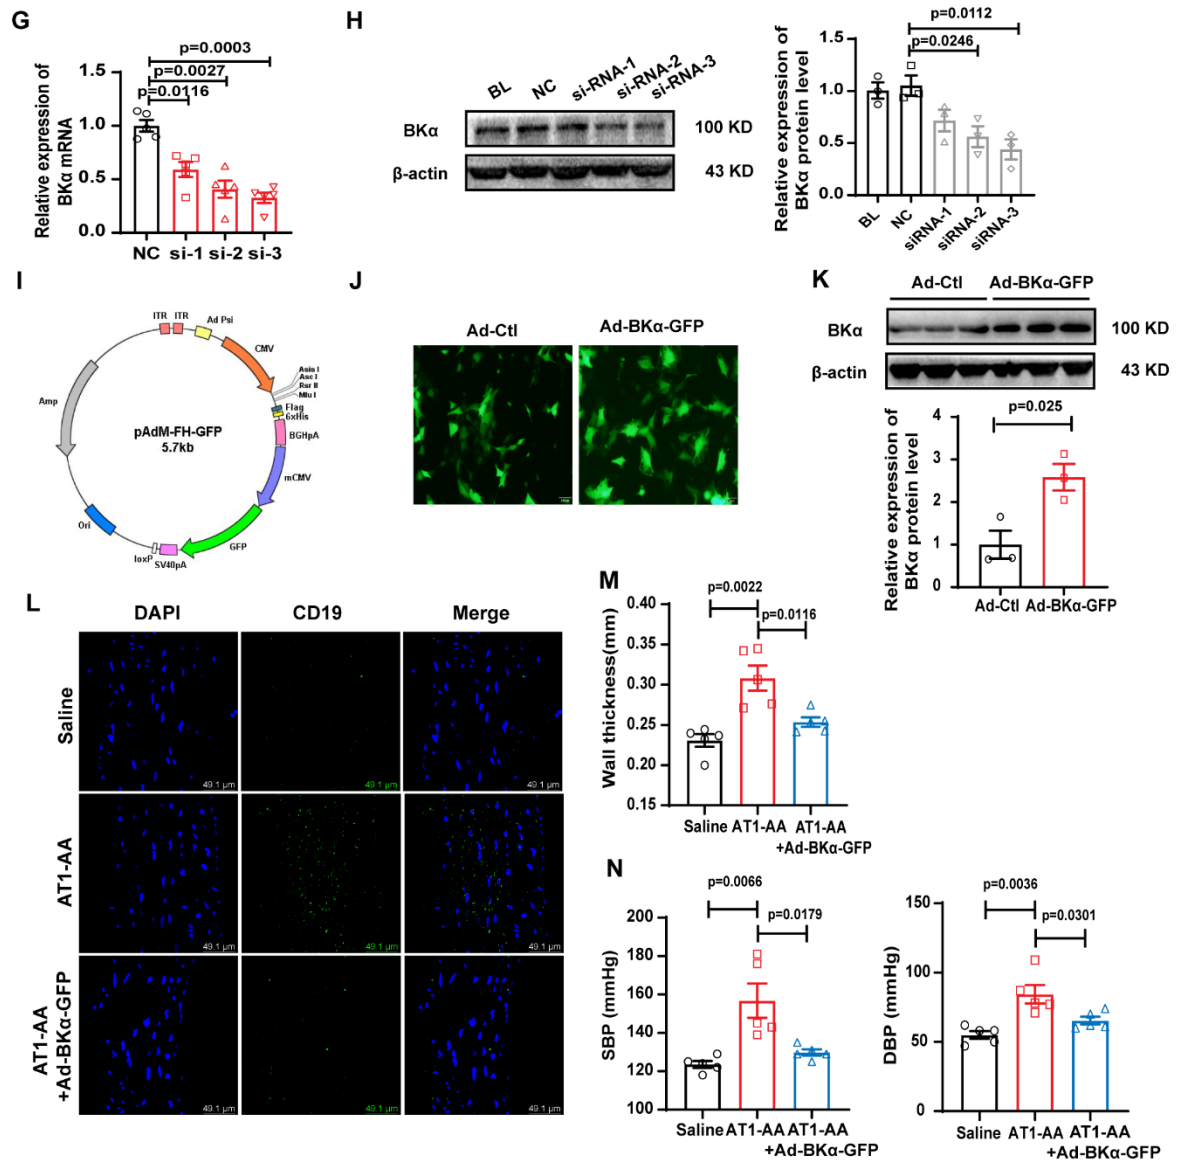

1

2

3 **Suppl. Figure 2 The function and expression of BKα are involved in the inflammatory**

4 **phenotype of VSMCs aggravated by AT1-AA. The infiltration of inflammatory cells in the vascular**

5 **wall of the thoracic aorta of AT1-AA-positive rats was detected by (A) immunofluorescence, bar=49.1**

6 **μm. (B) The open frequency of BK channel increased after SMCs were treated with NS1619. (C) The**

7 **expression of inflammatory cytokines was detected after VSMCs were treated with NS1619, n=3. (D)**

8 **The expression of inflammatory cytokines was detected after VSMCs were treated with IgG, β1-AA**

9 **and Ang II, n=6. (E) Detection of systolic and diastolic blood pressure in BKα-KO rats. (F)**

10 **Immunofluorescence was used to detect the infiltration of inflammatory cells in the blood vessel wall**

1 of the thoracic aorta of BK $\alpha$ -KO rats. Screening of effective siRNA sequences of BK $\alpha$  through (G)  
2 mRNA and (H) protein level, n=3. (I) BK $\alpha$  virus vector map. (J) Photographing the infection  
3 efficiency of primary thoracic aortic VSMCs in rats 24 h after BK $\alpha$  overexpression adenovirus  
4 infection. (K) Detection of BK $\alpha$  protein expression in SD rats infected by BK $\alpha$  adenovirus, n=3. (L)  
5 Immunofluorescence were used to detect the infiltration of inflammatory cells in the blood vessel wall  
6 of BK $\alpha$ -overexpression rats. (M) Thoracic aorta wall thickness and (N) tail blood pressure of model  
7 rats were measured after BK $\alpha$  adenovirus infection in AT1-AA-positive rats, n=5.

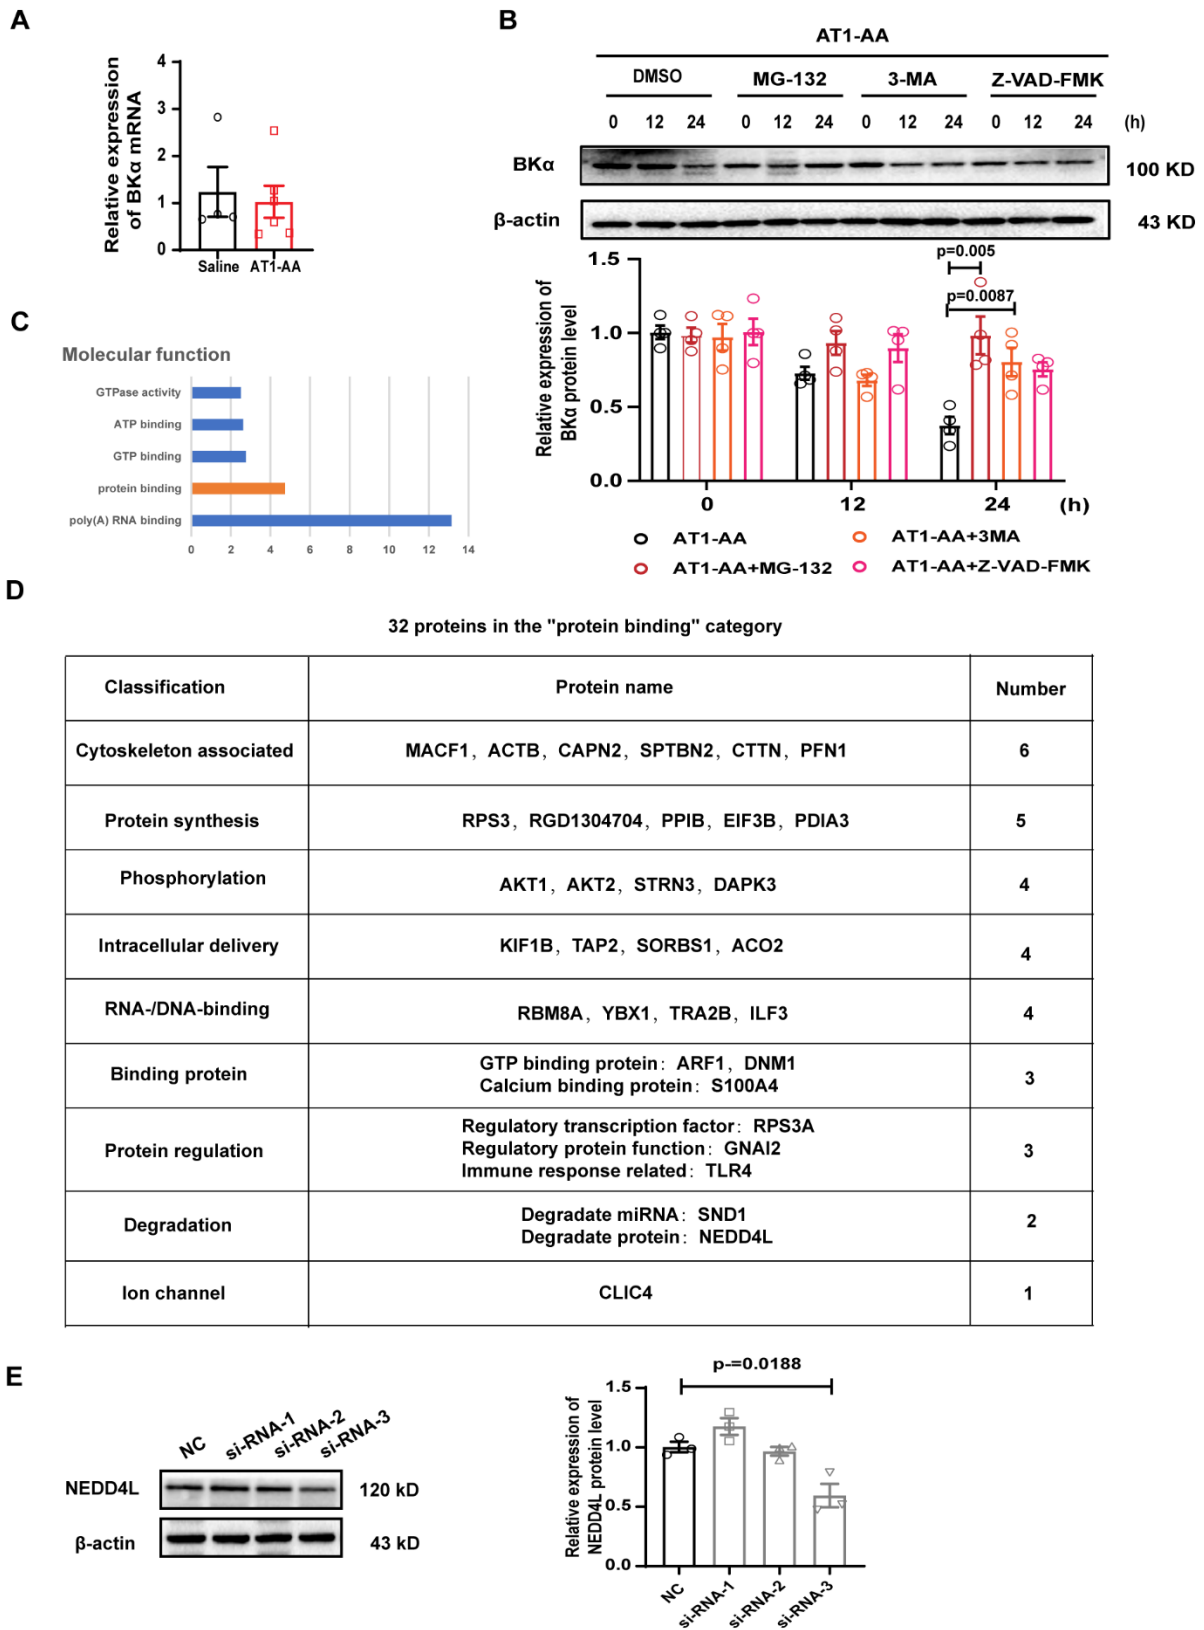

1

2

3 **Suppl. Figure 3 Screening NEDD4L by protein profile and selecting effective NEDD4LsiRNA**

1 **screening.** (A) Detection of BK $\alpha$  mRNA expression in the aorta of AT1-AA positive rats by PCR. (B)  
2 The possible pathway which AT1-AA downregulates the BK $\alpha$  protein level in VSMCs was detected  
3 by Western blot, n=4. (C) Use protein profile to screen NEDD4L, a protein related to ubiquitination in  
4 the protein binding category. (D) Use uniprot database to analyze the functions of 32 proteins in the  
5 "protein binding" category. (E) NEDD4L protein level was analyzed by western blot. Data are  
6 presented as mean  $\pm$  SEM, n=3. Statistical analyses by independent-samples t test and one-way  
7 ANOVA.



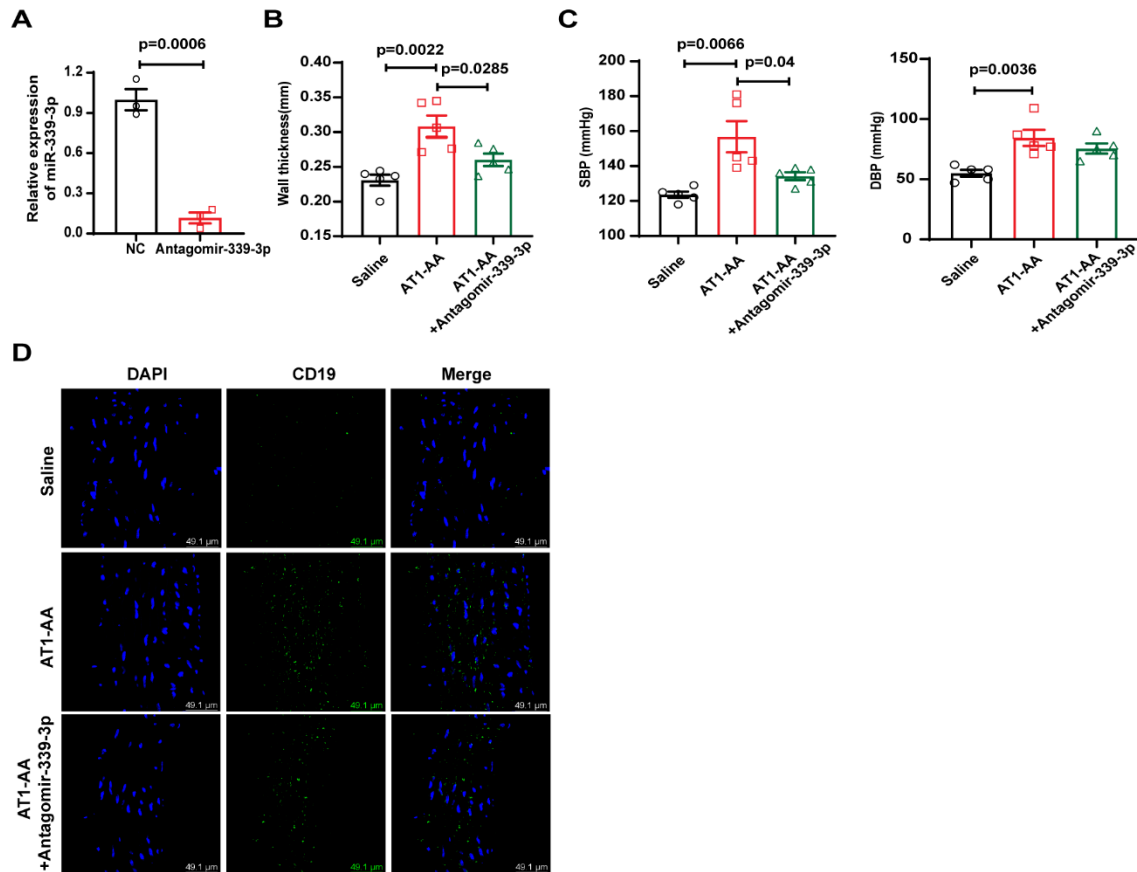

1

2 **Suppl. Figure 5 Antagomir-339-3p reversed the vascular injury in AT1-AA-positive rats. (A)**

3 Antagomir-339-3p significantly down-regulated the content of miR-339-3p in VSMCs,  $n=3$ . (B)

4 Thoracic aorta wall thickness and (C) tail blood pressure of model rats were measured after

5 antagomir-339-3p infection in AT1-AA-positive rats,  $n=5$ . (D) The marker of B lymphocytes surface

6 was detected via immunofluorescence method, bar=49  $\mu\text{m}$ .

7
